# Supplementary material for: Seroprevalence of SARS-CoV-2 in the West Bank region of Palestine: a cross-sectional seroepidemiological study
Source: PubMed Central journal article supplement — BMJ Open. 2021 Feb 4;11(2):e044552. doi: 10.1136/bmjopen-2020-044552 (PMC7868131; doi:10.1136/bmjopen-2020-044552), 2021-02-04
Supplement: bmjopen-2020-044552.draft_revisions.pdf [file bmjopen-2020-044552.draft_revisions.pdf]

# BMJ Open

BMJ Open is committed to open peer review. As part of this commitment we make the peer review history of every article we publish publicly available.

When an article is published we post the peer reviewers' comments and the authors' responses online. We also post the versions of the paper that were used during peer review. These are the versions that the peer review comments apply to.

The versions of the paper that follow are the versions that were submitted during the peer review process. They are not the versions of record or the final published versions. They should not be cited or distributed as the published version of this manuscript.

BMJ Open is an open access journal and the full, final, typeset and author-corrected version of record of the manuscript is available on our site with no access controls, subscription charges or pay-per-view fees (<http://bmjopen.bmj.com>).

If you have any questions on BMJ Open's open peer review process please email [info.bmjopen@bmj.com](mailto:info.bmjopen@bmj.com)

# BMJ Open

## Seroprevalence of SARS-CoV-2 in Palestine: a cross-sectional seroepidemiological study

|                               |                                                                                                                                                                                                                                                                                                                                                |
|-------------------------------|------------------------------------------------------------------------------------------------------------------------------------------------------------------------------------------------------------------------------------------------------------------------------------------------------------------------------------------------|
| Journal:                      | <i>BMJ Open</i>                                                                                                                                                                                                                                                                                                                                |
| Manuscript ID                 | bmjopen-2020-044552                                                                                                                                                                                                                                                                                                                            |
| Article Type:                 | Original research                                                                                                                                                                                                                                                                                                                              |
| Date Submitted by the Author: | 17-Sep-2020                                                                                                                                                                                                                                                                                                                                    |
| Complete List of Authors:     | Qutob, Nouar; Arab American University, ; Awartani, Faisal; Arab American University Salah, Zaidoun; Arab American University Asia, Mohammad; Arab American University Abu Khader, Imad; Arab American University Herzallah, Khaled; Arab American University Balqis, Nadeen; Arab American University Sallam, Husam; Arab American University |
| Keywords:                     | COVID-19, IMMUNOLOGY, EPIDEMIOLOGY                                                                                                                                                                                                                                                                                                             |
|                               |                                                                                                                                                                                                                                                                                                                                                |

SCHOLARONE™  
Manuscripts

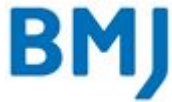

I, the Submitting Author has the right to grant and does grant on behalf of all authors of the Work (as defined in the below author licence), an exclusive licence and/or a non-exclusive licence for contributions from authors who are: i) UK Crown employees; ii) where BMJ has agreed a CC-BY licence shall apply, and/or iii) in accordance with the terms applicable for US Federal Government officers or employees acting as part of their official duties; on a worldwide, perpetual, irrevocable, royalty-free basis to BMJ Publishing Group Ltd ("BMJ") its licensees and where the relevant Journal is co-owned by BMJ to the co-owners of the Journal, to publish the Work in this journal and any other BMJ products and to exploit all rights, as set out in our [licence](#).

The Submitting Author accepts and understands that any supply made under these terms is made by BMJ to the Submitting Author unless you are acting as an employee on behalf of your employer or a postgraduate student of an affiliated institution which is paying any applicable article publishing charge ("APC") for Open Access articles. Where the Submitting Author wishes to make the Work available on an Open Access basis (and intends to pay the relevant APC), the terms of reuse of such Open Access shall be governed by a Creative Commons licence – details of these licences and which [Creative Commons](#) licence will apply to this Work are set out in our licence referred to above.

Other than as permitted in any relevant BMJ Author's Self Archiving Policies, I confirm this Work has not been accepted for publication elsewhere, is not being considered for publication elsewhere and does not duplicate material already published. I confirm all authors consent to publication of this Work and authorise the granting of this licence.

1  
2  
3 1  
4  
5 2  
6  
7 3 **Seroprevalence of SARS-CoV-2 in Palestine: a cross-sectional seroepidemiological study**  
8  
9  
10 4

11  
12  
13 5 Nouar Qutob , [Nouar.qutob@aaup.edu](mailto:Nouar.qutob@aaup.edu), Department of Health Sciences, Faculty of Graduate  
14  
15 6 Study, Arab American University, Palestine, phone number: 00970-562000202  
16  
17

18 7 Faisal Awartani, [faisal.awartani@aaup.edu](mailto:faisal.awartani@aaup.edu), Department of Health Sciences, Faculty of Graduate  
19  
20 8 Study, Arab American University, Palestine  
21  
22

23 9 Zaidoun Salah, [zaidoun.salah@aaup.edu](mailto:zaidoun.salah@aaup.edu), Department of Health Sciences, Faculty of Graduate  
24  
25 10 Study, Arab American University, Palestine  
26  
27

28  
29 11 Mohammad Asia, [Mohammad.asia@aaup.edu](mailto:Mohammad.asia@aaup.edu), Faculty of Allied Medical Sciences, Arab  
30  
31 12 American University, Palestine  
32  
33

34 13 Imad Abu Khader, [imad.abukhader@aaup.edu](mailto:imad.abukhader@aaup.edu), Faculty of Allied Medical Sciences, Arab  
35  
36 14 American University, Palestine  
37  
38

39 15 Khaled Herzallah, [khaled.herzallah@aaup.edu](mailto:khaled.herzallah@aaup.edu), Medical Labs, Arab American University,  
40  
41 16 Palestine  
42  
43

44 17 Nadeen Balqis, [Nadeen.Balqis@aaup.edu](mailto:Nadeen.Balqis@aaup.edu), Medical Labs, Arab American University, Palestine  
45  
46

47 18 Husam Sallam, [Husam.sallam@aaup.edu](mailto:Husam.sallam@aaup.edu), Medical Labs, Arab American University, Palestine  
48  
49

50  
51 19  
52  
53 20 Correspondence to: Nouar Qutob, Department of Health Sciences, Faculty of Graduate Study,  
54  
55 21 Arab American University, Palestine  
56  
57

1  
2  
3  
4  
5  
6  
7  
8  
9  
10  
11  
12  
13  
14  
15  
16  
17  
18  
19  
20  
21  
22  
23  
24  
25  
26  
27  
28  
29  
30  
31  
32  
33  
34  
35  
36  
37  
38  
39  
40  
41  
42  
43  
44  
45  
46  
47  
48  
49  
50  
51  
52  
53  
54  
55  
56  
57  
58  
59  
60

22 Keywords: seroprevalence, Sars-cov-2, Palestine, immunity, covid-19

23

24 Word count: 2031

25

For peer review only

1  
2  
3 26  
4  
56 27 **Abstract**7  
8  
9 28 Objectives

10  
11  
12 29 Seroprevalence rates are important indicators to the epidemiology of COVID-19 and the extent of  
13  
14 30 the pandemic given the existence of asymptomatic cases. The purpose of this study is to assess the  
15  
16 31 seroprevalence rate in the Palestinian population residing in the West Bank.  
17  
18  
19

20 32  
21  
22 33 Setting

23  
24  
25 34 The study involved 1355 participants from 11 governorates, including 112 localities in the West  
26  
27 35 Bank, Palestine.  
28  
29

30 36  
31  
32 37 Participants

33  
34  
35 38 Blood samples were collected between 15<sup>th</sup> June 2020 and 30<sup>th</sup> June 2020 from 1355 individuals  
36  
37 39 from randomly selected households in the West Bank in addition to 1136 individuals visiting  
38  
39 40 Palestinian medical laboratories between the 1<sup>st</sup> May 2020 and 9<sup>th</sup> July 2020 for a *routine checkup*.  
40  
41  
42

43 41  
44  
45 42 Primary and secondary outcome measures

46  
47  
48 43 Out of the 2491 blood samples collected, serological tests for 2455 adequate serum samples were  
49  
50 44 done using an Immunoassay for qualitative detection of antibodies against SARS-CoV-2.  
51  
52 45 seroprevalence was estimated as the proportion of individuals who had a positive result in the total  
53  
54 46 SARS-CoV-2 antibodies in the immunoassay  
55  
56  
57

1  
2  
3 47  
45 48 Results  
6  
7

8 49 The random sample of Palestinians living in the West Bank yielded 0% seroprevalence with 95%  
9  
10 50 CI [0,0.0036], while the lab referrals sample yielded an estimated seroprevalence of 0.354% with  
11  
12  
13 51 95% CI [0.0011,0096].  
14  
15

16 52  
1718 53 Conclusions  
19

20 54 Our results indicate that as of July 2020, seroprevalence in Palestine persist low and is inadequate  
21  
22 55 to provide herd immunity, emphasizing the need to maintain health measures to keep the outbreak  
23  
24  
25 56 under control. Population-based *seroprevalence studies are to be conducted periodically to*  
26  
27 57 *monitor the SARS-CoV-2 seroprevalence in Palestine and inform policy makers about the efficacy*  
28  
29 58 *of their surveillance system.*  
30  
31

32 59  
33  
34  
3536 60  
37  
38  
39  
40  
41  
42  
43  
44  
45  
46  
47  
48  
49  
50  
51  
52  
53  
54  
55  
56  
57  
58  
59  
60

1  
2  
3 **61 Strengths and limitations of this study**  
4

5  
6 **62 Strengths:**  
7

8  
9 **63** 1- The random selection of households residents collected between 15<sup>th</sup> June 2020 and 30<sup>th</sup>  
10  
11 **64** June 2020. The clusters were selected using probability proportional to size (PPS)  
12  
13 **65** sampling.  
14

15  
16 **66** 2- The study also included 1136 participants from Medicare laboratory referrals between 1<sup>st</sup>  
17  
18 **67** May 2020 and 9<sup>th</sup> July 2020 in 16 branches in the West Bank, which had good  
19  
20 **68** representation of females as well as children  
21

22  
23 **69** Limitations:  
24

25  
26 **70** 1- Low representation in females represented in the random sample, the samples from female  
27  
28 **71** were more difficult to obtain due to a cultural inhibition regarding allowing nurses to enter  
29  
30 **72** the households.  
31

32  
33 **73** 2- The random sample did not include children under the age of 15 to avoid anxiety due to  
34  
35 **74** fear of needles in the study to eliminate personal fears due to blood withdrawal.  
36

37  
38 **75** 3- Our study only detected Sars-Cov2 antibodies. However, it is important to recognize that  
39  
40 **76** cellular immunity may play a role in providing immunity against SARS-CoV-2  
41  
42 **77** reinfection<sup>18</sup>. Further studies aimed at testing cellular immunity are important.  
43

44  
45 **78**

46  
47  
48 **79**

49  
50  
51 **80**

52  
53 **81**

54  
55  
56 **82**  
57  
58  
59  
60



83

## 84 **Introduction**

85 Coronavirus disease 2019, known as COVID-19, is an infectious respiratory disease caused by  
86 novel coronavirus SARS-CoV-2 <sup>1</sup>. Since its emergence in Wuhan, China in December 2019 <sup>2</sup>,  
87 SARS-CoV-2 has spread rapidly around the globe, ultimately being declared by the World Health  
88 Organization (WHO) as a global pandemic <sup>3,4</sup> and new cases and deaths are being reported daily<sup>5</sup>.  
89 Most authorities rely on PCR testing results to estimate number of COVID-19 cases and make up-  
90 to-date decisions <sup>6</sup>. Thus, numbers of patients tested positive for SARS-CoV-2 through PCR  
91 testing, symptomatic patients, those admitted to hospitals, or deceased from Covid-19 are updated  
92 on a daily basis. However, the data may exclude a fraction of the population with previous mild or  
93 asymptomatic COVID-19 that has not been tested by PCR. The proportion of the population who  
94 have overcome the infection without being noticed can probably be approximated by testing for  
95 antibodies against SARS-CoV-2. Antibodies may confer immunity to repeat infection and a high  
96 proportion of immune individuals can attenuate the epidemic. Measures of anti-SARS-CoV-2  
97 seroprevalence can also be used to estimate the clinical impact of COVID-19. To this effect,  
98 several serological surveys of SARS-CoV-2 have been done worldwide <sup>7-16</sup>.

99 **Objective:**

100 There is lack of data on the the percentage of undiagnosed Palestinian population with previous  
101 mild or asymptomatic COVID-19. Prevalence of COVID-19 among Palestinian remains unknown  
102 and many are concerned about this uncertainty. To this end, we conducted a population cross  
103 sectional based seroepidemiological study to assess the spread of SARS-CoV-2 throughout the  
104 West Bank. The study included 2491 individuals, designed to be representative by cities (1355

1  
2  
3 105 from randomly selected households and 1136 from laboratory referrals). Elecsys® Anti-SARS-  
4  
5 106 CoV-2 testing was done on 2455 adequate serum samples. Here, we describe the study design and  
6  
7  
8 107 the results of the first wave of the study.  
9

## 10 108 **Methods**

### 11 109 **Study design and participants**

12  
13  
14  
15  
16  
17 110 The study conducted is a cross-sectional serologic testing study aimed to investigate seropositivity  
18  
19 111 for SARS-CoV-2 in the non-institutionalized Palestinian population residing in the West Bank.

20  
21  
22 112 The study involved 1355 participants from 11 governorates, including 112 localities  
23  
24 113 (supplementary table 1). 1395 households were selected using 3-stage cluster sampling. The  
25  
26 114 cluster of households or census track is considered to be a geographic location that is comprised  
27  
28 115 of approximately 100 households. The process for conducting cluster sampling was carried as  
29  
30 116 follows : (1) Selecting a cluster of households, (2) Selecting 10 households randomly from each  
31  
32 117 cluster and (3) Selecting a person at random from the selected household. The clusters were  
33  
34  
35 118 selected using probability proportional to size (PPS) sampling (Table 1).  
36  
37  
38

39 119  
40  
41  
42 120 To select the number of clusters within each population location: (1) we calculated the sampling  
43  
44 121 interval which equals the total number of households divided by the total number of clusters need  
45  
46 122 to be selected by the sample say for example (m). So the sampling interval  $SI = N/m$ , where N is  
47  
48 123 the total number of households. (2) selected a random number  $R_0$  between 0 and SI. (3) calculated  
49  
50 124  $R_i$  as  $R_0 + i * SI$ , a cluster is selected in  $L_i$  if  $R_i$  belongs to the interval  $[C_{i-1}, C_i]$ .  
51  
52  
53  
54  
55  
56  
57  
58  
59  
60

1  
2  
3 125 Field work was carried out between 15<sup>th</sup> June 2020 and 30<sup>th</sup> June 2020 by a team of registered  
4  
5 126 nurses, laboratory technicians, nursing students and laboratory technician students from the Arab  
6  
7  
8 127 American University following standardized health protocols (World Health, 2020) .  
9

10  
11 128 The study also included 1136 participants from Medicare laboratory referrals between 1<sup>st</sup> May  
12  
13 129 2020 and 9<sup>th</sup> July 2020 in 16 branches in the West Bank (supplementary table 2) .  
14  
15

16 130 Participants donated a blood sample for antibodies detection. Blood samples were centrifuged and  
17  
18 131 serum was separated, labelled, stored at -20C at AAUP laboratory until it was used.  
19  
20

### 21 132 **Detection of antibodies**

22  
23  
24 133 Serological tests for 2455 adequate serum samples were done using an Immunoassay for the  
25  
26 134 qualitative detection of antibodies against SARS-CoV-2 (Elecsys<sup>®</sup> Anti-SARS-CoV-2) in human  
27  
28 135 serum by using the Cobas analyzer cobas e 411 (Roche) . The assay uses a recombinant protein  
29  
30 136 representing the nucleocapsid (N) antigen for the determination of antibodies against SARS-CoV-  
31  
32 137 2 with testing time of 18 minutes. We included 6 samples from recovered cases with detected  
33  
34 138 SARS-COV2 antibodies as a positive control.  
35  
36  
37

### 38 139 39 40 140 **Statistical Analysis**

41  
42  
43 141 We estimated seroprevalence as the proportion of individuals who had a positive result in the total  
44  
45 142 SARS-CoV-2 antibodies in the immunoassay.  
46  
47

48 143 We used Wilson Method With Continuity Correction and Boundary Truncation (WCCBT) to  
49  
50 144 construct 95% CI for the population parameter of seroprevalence <sup>17</sup> .  
51  
52  
53

### 54 145 **Patients and public involvement**

55  
56  
57  
58  
59  
60

1  
2  
3 146 The study involved 1355 participants from 11 governorates, including 112 localities and included  
4  
5 147 1136 participants from Medicare laboratory referrals. The development of the research question  
6  
7  
8 148 and outcome measures was based on the public priorities to know the seroprevalence in the  
9  
10 149 Palestinian community. Approval from National ethical committee was obtained  
11  
12 150 (PHRC/HC/737/20). Written informed consent was obtained from the 1355 study participants and  
13  
14 151 approvals were obtained from Medicare laboratories for samples to be tested. Participants were  
15  
16 152 notified of the results of the tests.  
17  
18

## 19 153 **Results**

20  
21  
22 154 Of the 1395 eligible individuals residing in households selected using 3-stage cluster sampling,  
23  
24 155 1355 participants agreed to participate in the study. The proportion of females was lower  
25  
26 156 compared to males (137, 1218 respectively) including 349 in age group (15-24), 314 in age group  
27  
28 157 (25-34), 377 in age group (35-49) and 315 in age group (50+). Out of the 1355 blood samples  
29  
30 158 collected, 1319 serum samples were adequate for testing. None of the tested specimens revealed  
31  
32 159 presence of antibodies against SARS-CoV-2. A 95% CI for the population parameter of  
33  
34 160 seroprevalence was [0,0.0036].  
35  
36  
37  
38

39 161 Of the 1136 participants from Medicare laboratory referrals in 16 branches. The proportion of  
40  
41 162 males was lower than females (395, 741 respectively) including 71 in age group lower less than  
42  
43 163 15, 173 in age group (15-24), 297 tests in age group (25-34), 290 in age group (35-49) and 305  
44  
45 164 in age group (50+). All serum samples were adequate for testing. Out of the 1136 tested  
46  
47 165 participants, 4 revealed antibodies against Sars-CoV-2 with 95% CI [0.0011,0096].  
48  
49  
50

51 166

## 52 167 **Discussion**

1  
2  
3 168 To our knowledge, this is the first SARS-CoV-2 seroprevalence study in Palestine. The findings  
4  
5 169 from this seroprevalence study for SARS-CoV-2 indicate that the estimated seroprevalence of the  
6  
7 170 total SARS-COV2 antibodies persist low. The random sample of Palestinians living in the West  
8  
9 171 Bank yeilded 0% seroprevalence with 95% CI [0,0.0036], while the lab referrals sample yielded  
10  
11 172 an estimated seroprevalence of 0.354% with 95% CI [0.0011,0096]. Seroprevelance in Palestine  
12  
13 173 is very close to that identified in Jordan (0% prevalence)<sup>15</sup>, a neighboring country, which was  
14  
15 174 explained to be due to the strict closures implemented by the Jordanian government and the  
16  
17 175 eventual curtailing of infections in Jordan. In comparison to other countries like Spain, Italy. Japan  
18  
19 176 India, Los Angeles, Germany, Switzerland the seroprevalence in Palestine is low<sup>7-16</sup>. It is,  
20  
21 177 however, noteworthy that a comparison with other countries may be problematic due to the timing  
22  
23 178 and the stage of the pandemic which may vary affecting the seroprevalence estimates.  
24  
25  
26  
27  
28  
29

30  
31 180 A key strength of our study is the random selection of households residents collected between 15<sup>th</sup>  
32  
33 181 June 2020 and 30<sup>th</sup> June 2020. The clusters were selected using probability proportional to size  
34  
35 182 (PPS) sampling. This technique ensures getting self-weighting sample which can be used to  
36  
37 183 produce unbiased estimators for the parameters of interest. However, samples from female were  
38  
39 184 more difficult to obtain due to a cultural inhibition regarding allowing nurses to enter the  
40  
41 185 households. Also, random sample did not include children under the age of 15 to avoid anxiety  
42  
43 186 due to fear of needles in the study to eliminate personal fears due to blood withdrawl.  
44  
45  
46  
47  
48  
49

50  
51 188 As for the lab referals sample, it represents the population of the lab referals between the 1<sup>st</sup> May  
52  
53 189 2020 and 9<sup>th</sup> July 2020. The seroprevalence in this sample was 4 positive cases out of the 1136  
54  
55 190 samples tested. Since the seroprevalence within the lab referral population is close to zero , we  
56  
57  
58  
59

1  
2  
3 191 used Wilson Method With Continuity Correction and Truncation (WCCBT) to construct a 95%  
4  
5 192 confidence interval for the population parameter of seroprevalence [0.0011,0096].  
6  
7

8 193  
9  
10 194 Our study only detected Sars-Cov2 antibodies. However, it is important to recognize that cellular  
11  
12 195 immunity may play a role in providing immunity against SARS-CoV-2 reinfection<sup>18</sup>. Further  
13  
14 196 studies aimed at testing cellular immunity are important. It is also noteworthy that previous studies  
15  
16 197 have indicated that asymptomatic individuals were reported to have a weaker immune response to  
17  
18 198 SARS-CoV-2 infection and a higher percentage of asymptomatic individuals became seronegative  
19  
20 199 when compared to symptomatic individuals in the early recovering phases. The reduction in  
21  
22 200 neutralizing antibody levels may have implications for immunity strategy and serological surveys  
23  
24 201<sup>19</sup>.  
25  
26  
27  
28

29 202  
30  
31 203 In conclusion, our study provides estimates of SARS-CoV-2 seroprevalence in Palestine. Our  
32  
33 204 estimate is low indicating that as of July 2020 the population does not have herd immunity. In this  
34  
35 205 situation, health measures have to be taken to keep the outbreak under control. In order to monitor  
36  
37 206 the SARS-CoV-2 seroprevalence in Palestine and inform policy makers about the efficacy of their  
38  
39 207 surveillance system, conducting population-based seroprevalence studies on a regular basis is  
40  
41 208 important.  
42  
43  
44

45 209

## 48 210 **Acknowledgment**

49  
50  
51 211 We thank the participants for their cooperation.  
52  
53  
54  
55  
56  
57  
58  
59  
60

1  
2  
3 212 We thank the registered nurses, laboratory technicians, nursing students and laboratory  
4  
5 213 technician students from the Arab American University: Ahmad Hodrub, Mohammad Faisal,  
6  
7 214 Wajdi Tu`ma , Adam Maraw`a, Sharhabeel Nasrallah, Hisham Zahran and Mohammad Barakat  
8  
9  
10 215 We thank Medicare labs for providing blood samples of individuals visiting their laboratories.  
11  
12  
13  
14 216

### 16 217 **Conflict of Interest Disclosures**

18  
19 218 No authors reported disclosures.  
20  
21  
22  
23 219

### 25 220 **Funding/Support**

27  
28 221 The study was funded by the Arab American University.  
29  
30  
31 222

### 34 223 **Authors contribution**

36  
37 224 Research design: Nouar Qutob, Zaidoun Salah, Faisal Awartani  
38  
39  
40 225 Field work coordination: Mohammad Asia, Imad Abu Khader  
41  
42

43 226 Data analysis: Faisal Awartani  
44  
45

46 227 Manuscript writing: Nouar Qutob  
47  
48

49 228 Manuscript revisions: Nouar Qutob, Faisal Awartani, Zaidoun Salah, Mohammad Asia  
50  
51

52 229 Methodology and lab work: Nouar Qutob, Khaled Herzallah, Nadeen Balqis, Husam Sallam  
53  
54

55 230  
56  
57  
58  
59  
60

231 **References**

- 232 1. Mayo clinic. oronavirus disease 2019 (COVID-19).
- 233 2. Lu H, Stratton CW, Tang YW. Outbreak of pneumonia of unknown etiology in Wuhan,  
234 China: The mystery and the miracle. *J Med Virol.* 2020;92(4):401-402.  
235 doi:10.1002/jmv.25678
- 236 3. World Health Organization. *Novel Coronavirus(2019-NCoV), Situation Report - 12.*;  
237 2020.
- 238 4. Hui DS, I Azhar E, Madani TA, Ntoumi F, Kock R, Dar O et al. The continuing 2019-  
239 nCoV epidemic threat of novel coronaviruses to global health — The latest 2019 novel  
240 coronavirus outbreak in Wuhan, China The. 2020;(January).
- 241 5. COVID-19 Dashboard by the Center for Systems Science and Engineering (CSSE) at  
242 Johns Hopkins University (JHU).
- 243 6. Onder G, Rezza G, Brusaferro S. Case-Fatality Rate and Characteristics of Patients Dying  
244 in Relation to COVID-19 in Italy. *JAMA - J Am Med Assoc.* 2020;2019:2019-2020.  
245 doi:10.1001/jama.2020.4683
- 246 7. Snoeck CJ, Vaillant M, Abdelrahman T, et al. Prevalence of SARS-CoV-2 infection in the  
247 Luxembourgish population the CON-VINCE study. *Medrxiv.* 2020:2020.05.11.20092916.  
248 doi:10.1101/2020.05.11.20092916
- 249 8. Wu X, Fu B, Chen L, Feng Y. Serological tests facilitate identification of asymptomatic  
250 SARS-CoV-2 infection in Wuhan, China. *J Med Virol.* 2020:2-3. doi:10.1002/jmv.25904
- 251 9. Bryan A, Pepper G, Wener MH, et al. Performance Characteristics of the Abbott Architect



- 1  
2  
3 252 SARS-CoV-2 IgG Assay and Seroprevalence in Boise, Idaho. *J Clin Microbiol.*  
4  
5 253 2020;(May). doi:10.1128/JCM.00941-20  
6  
7  
8 254 10. Stringhini S, Wisniak A, Piumatti G, et al. Repeated seroprevalence of anti-SARS-CoV-2  
9  
10 255 IgG antibodies in a population-based sample from Geneva, Switzerland. *medRxiv.*  
11  
12 256 2020:2020.05.02.20088898. doi:10.1101/2020.05.02.20088898  
13  
14  
15  
16 257 11. Valenti L, Bergna A, Pelusi S, et al. SARS-CoV-2 seroprevalence trends in healthy blood  
17  
18 258 donors during the COVID-19 Milan outbreak. *medRxiv.* 2020:2020.05.11.20098442.  
19  
20 259 doi:10.1101/2020.05.11.20098442  
21  
22  
23 260 12. Shakiba M, Hashemi Nazari SS, Mehrabian F, Rezvani SM, Ghasempour Z, Heidarzadeh  
24  
25 261 A. Seroprevalence of COVID-19 virus infection in Guilan province, Iran. *medRxiv.*  
26  
27 262 2020:2020.04.26.20079244. doi:10.1101/2020.04.26.20079244  
28  
29  
30  
31 263 13. Pollán M, Pérez-Gómez B, Pastor-Barriuso R, et al. Prevalence of SARS-CoV-2 in Spain  
32  
33 264 (ENE-COVID): a nationwide, population-based seroepidemiological study. *Lancet*  
34  
35 265 (*London, England*). 2020;6736(20):1-11. doi:10.1016/S0140-6736(20)31483-5  
36  
37  
38  
39 266 14. Stadlbauer D, Amanat F, Chromikova V, et al. SARS-CoV-2 Seroconversion in Humans:  
40  
41 267 A Detailed Protocol for a Serological Assay, Antigen Production, and Test Setup. *Curr*  
42  
43 268 *Protoc Microbiol.* 2020;57(1):2425-2427. doi:10.1002/cpmc.100  
44  
45  
46 269 15. Sughayer MA, Mansour A, Nuirat A Al, Souan L, Ghanem M, Siag M. Covid-19  
47  
48 270 Seroprevalence rate in healthy blood donors from a community under strict lockdown  
49  
50 271 measures. *medRxiv.* 2020:2020.06.06.20123919. doi:10.1101/2020.06.06.20123919  
51  
52  
53  
54 272 16. Hains DS, Schwaderer AL, Carroll AE, Starr MC, Wilson AC. Seroprevalence of SARS-

- 1  
2  
3 273 CoV-2 – Specific Antibodies Among Adults in Los Angeles County , California , on April  
4  
5 274 10-11 , 2020. 2020;323(23):2425-2427. doi:10.1002/cpmc.100  
6  
7  
8 275 17. Sakthivel Sivam SM. Everything or Nothing - A Better Confidence Intervals for Binomial  
9  
10 276 Proportion in Clinical Trial Data Analysis . Sakthivel Sivam , Quartesian LLC , Princeton  
11  
12 , New Jersey Subbiah Meenakshisundaram , L . N Government College , Ponneri , India.  
13 277  
14 2016;(2014).  
15 278  
16  
17  
18 279 18. Sekine T, Perez-Potti A, Rivera-Ballesteros O, et al. Robust T cell immunity in  
19  
20 280 convalescent individuals with asymptomatic or mild COVID-19. *bioRxiv*.  
21  
22 2020:2020.06.29.174888. doi:10.1101/2020.06.29.174888  
23 281  
24  
25  
26 282 19. Quan-Xin Long 1, 8, Xiao-Jun Tang<sup>2, 8</sup>, Qiu-Lin Shi<sup>2, 8</sup>, Qin Li<sup>3, 8</sup>, Hai-Jun Deng 1, 8  
27  
28 283 JY, Hu<sup>1</sup> J-L, Xu<sup>2</sup> W, et al. Clinical and immunological assessment of asymptomatic  
29  
30 284 SARS-CoV-2 infections. *Nat Med*. 2020.

31  
32  
33 285  
34  
35  
36 286  
37  
38  
39 287  
40  
41  
42  
43  
44  
45  
46  
47  
48  
49  
50  
51  
52  
53  
54  
55  
56  
57  
58  
59  
60

Supplementary Table 1: Governorates and localities included in the households sample

| Governorate | Locality               |
|-------------|------------------------|
| Jenin       | Sir                    |
| Jenin       | Anza                   |
| Jenin       | Al Araqa               |
| Jenin       | Al Mughayyir           |
| Jenin       | Al Fandaqumiya         |
| Jenin       | Al Judeida             |
| Jenin       | Ajja                   |
| Jenin       | Birqin                 |
| Jenin       | Meithalun              |
| Jenin       | Jaba                   |
| Jenin       | Silat al Harithiya     |
| Jenin       | Arraba                 |
| Jenin       | Yabad                  |
| Jenin       | Al Yamun               |
| Jenin       | Qabatiya               |
| Jenin       | Jenin                  |
| Tubas       | Ras al Faraa           |
| Tubas       | Aqqaba                 |
| Tubas       | Tammun                 |
| Tubas       | Tubas                  |
| Tulkarm     | Kafa                   |
| Tulkarm     | Kafr Jammal            |
| Tulkarm     | Kafr al Labad          |
| Tulkarm     | Nur Shams Camp         |
| Tulkarm     | Bala                   |
| Tulkarm     | Tulkarm Camp           |
| Tulkarm     | Attil                  |
| Tulkarm     | Tulkarm                |
| Nablus      | Iraq Burin             |
| Nablus      | Qusin                  |
| Nablus      | As Sawiya              |
| Nablus      | Majdal Bani Fadil      |
| Nablus      | Sabastiya              |
| Nablus      | Ein Beit el Ma Camp    |
| Nablus      | Beit Dajan             |
| Nablus      | Qusra                  |
| Nablus      | Askar Camp )al Qadeem( |
| Nablus      | Awarta                 |
| Nablus      | Asira ash Shamaliya    |
| Nablus      | Aqraba                 |

|                     |                    |
|---------------------|--------------------|
| Nablus              | Beit Furik         |
| Nablus              | Balata Camp        |
| Nablus              | Nablus             |
| Qalqiliya           | Kafr Laqif         |
| Qalqiliya           | Jinsafut           |
| Qalqiliya           | Sanniriya          |
| Qalqiliya           | Azzun              |
| Qalqiliya           | Qalqiliya          |
| Salfit              | Deir Istiya        |
| Salfit              | Haris              |
| Salfit              | Biddya             |
| Salfit              | Salfit             |
| Ramallah & Al-Bireh | Shabtin            |
| Ramallah & Al-Bireh | Ein Arik           |
| Ramallah & Al-Bireh | Beitin             |
| Ramallah & Al-Bireh | Ein Yabrud         |
| Ramallah & Al-Bireh | Arura              |
| Ramallah & Al-Bireh | Beitillu           |
| Ramallah & Al-Bireh | Deir Abu Mashaal   |
| Ramallah & Al-Bireh | Khirbet Abu Falah  |
| Ramallah & Al-Bireh | Beit Ur at Tahta   |
| Ramallah & Al-Bireh | Shuqba             |
| Ramallah & Al-Bireh | Qibya              |
| Ramallah & Al-Bireh | Al Jalazun Camp    |
| Ramallah & Al-Bireh | Beituniya          |
| Ramallah & Al-Bireh | Ramallah           |
| Ramallah & Al-Bireh | Al Bireh           |
| Jericho & Al-Aghwar | Ein as Sultan Camp |
| Jericho & Al-Aghwar | Jericho )Ariha(    |

|           |                            |
|-----------|----------------------------|
| Jerusalem | Ash Sheikh Sad             |
| Jerusalem | Beit Surik                 |
| Jerusalem | As Sawahira ash Sharqiya   |
| Jerusalem | Hizma                      |
| Jerusalem | Qalandiya Camp             |
| Jerusalem | Ar Ram & Dahiyat al Bareed |
| Jerusalem | Anata                      |
| Jerusalem | Al Eizariya                |
| Bethlehem | Al Masara                  |
| Bethlehem | Wadi Rahhal                |
| Bethlehem | Dar Salah                  |
| Bethlehem | Husan                      |
| Bethlehem | Hindaza and Bureidaa       |
| Bethlehem | Nahhalin                   |
| Bethlehem | Ad Duheisha Camp           |
| Bethlehem | Ad Doha                    |
| Bethlehem | Beit Sahur                 |
| Bethlehem | Beit Jala                  |
| Bethlehem | Beit Fajjar                |
| Bethlehem | Bethlehem (Beit Lahm)      |
| Hebron    | An Najada                  |
| Hebron    | Beit ar Rush al Fauqa      |
| Hebron    | Shuyukh al Arrub           |
| Hebron    | Al Burj and Al Bira        |
| Hebron    | Nuba                       |
| Hebron    | Al Fawwar Camp             |
| Hebron    | Beit Kahil                 |
| Hebron    | Kharas                     |
| Hebron    | Beit Awwa                  |
| Hebron    | Beit Ula                   |
| Hebron    | Taffuh                     |
| Hebron    | Beit Ummar                 |
| Hebron    | Surif                      |
| Hebron    | Tarqumiya                  |
| Hebron    | Sair                       |
| Hebron    | Bani Naim                  |
| Hebron    | Idhna                      |
| Hebron    | As Samu                    |
| Hebron    | Halhul                     |
| Hebron    | Adahiriya                  |
| Hebron    | Dura                       |
| Hebron    | Yatta                      |

|        |                    |
|--------|--------------------|
| Hebron | Hebron (Al Khalil) |
|--------|--------------------|

For peer review only

Supplementary Table 2: Governorates and localities included in the lab referrals sample

| <b>Governorate</b> | <b>Locality</b>    |
|--------------------|--------------------|
| Jericho            | Jericho            |
| Hebron             | Dura               |
| Hebron             | Yatta              |
| Hebron             | Hebron (Al Khalil) |
| Hebron             | Adahiriya          |
| Bethany            | Bethany            |
| Bethlehem          | Bethlehem          |
| Jenin              | Jenin              |
| Ramallah           | Ramallah           |
| Ramallah           | Silwad             |
| Tubas              | Tubas              |
| Tulkarem           | Tulkarem           |
| Qalqiliah          | Qalqiliah          |
| Nablus             | Nablus             |
| Salfit             | Bidia              |
| Salfit             | Salfit             |

## STROBE Statement—checklist of items that should be included in reports of observational studies

|                              | Item No | Recommendation                                                                                                                                                                                                                                                                                                                                                                                                                                                                                                                                                                                                                                                                                   |
|------------------------------|---------|--------------------------------------------------------------------------------------------------------------------------------------------------------------------------------------------------------------------------------------------------------------------------------------------------------------------------------------------------------------------------------------------------------------------------------------------------------------------------------------------------------------------------------------------------------------------------------------------------------------------------------------------------------------------------------------------------|
| <b>Title and abstract</b>    | 1       | (a) Indicate the study's design with a commonly used term in the title or the abstract<br>(b) Provide in the abstract an informative and balanced summary of what was done and what was found                                                                                                                                                                                                                                                                                                                                                                                                                                                                                                    |
| <b>Introduction</b>          |         |                                                                                                                                                                                                                                                                                                                                                                                                                                                                                                                                                                                                                                                                                                  |
| Background/rationale         | 2       | Explain the scientific background and rationale for the investigation being reported                                                                                                                                                                                                                                                                                                                                                                                                                                                                                                                                                                                                             |
| Objectives                   | 3       | State specific objectives, including any prespecified hypotheses                                                                                                                                                                                                                                                                                                                                                                                                                                                                                                                                                                                                                                 |
| <b>Methods</b>               |         |                                                                                                                                                                                                                                                                                                                                                                                                                                                                                                                                                                                                                                                                                                  |
| Study design                 | 4       | Present key elements of study design early in the paper                                                                                                                                                                                                                                                                                                                                                                                                                                                                                                                                                                                                                                          |
| Setting                      | 5       | Describe the setting, locations, and relevant dates, including periods of recruitment, exposure, follow-up, and data collection                                                                                                                                                                                                                                                                                                                                                                                                                                                                                                                                                                  |
| Participants                 | 6       | (a) <i>Cohort study</i> —Give the eligibility criteria, and the sources and methods of selection of participants. Describe methods of follow-up<br><i>Case-control study</i> —Give the eligibility criteria, and the sources and methods of case ascertainment and control selection. Give the rationale for the choice of cases and controls<br><i>Cross-sectional study</i> —Give the eligibility criteria, and the sources and methods of selection of participants<br>(b) <i>Cohort study</i> —For matched studies, give matching criteria and number of exposed and unexposed<br><i>Case-control study</i> —For matched studies, give matching criteria and the number of controls per case |
| Variables                    | 7       | Clearly define all outcomes, exposures, predictors, potential confounders, and effect modifiers. Give diagnostic criteria, if applicable                                                                                                                                                                                                                                                                                                                                                                                                                                                                                                                                                         |
| Data sources/<br>measurement | 8*      | For each variable of interest, give sources of data and details of methods of assessment (measurement). Describe comparability of assessment methods if there is more than one group                                                                                                                                                                                                                                                                                                                                                                                                                                                                                                             |
| Bias                         | 9       | Describe any efforts to address potential sources of bias                                                                                                                                                                                                                                                                                                                                                                                                                                                                                                                                                                                                                                        |
| Study size                   | 10      | Explain how the study size was arrived at                                                                                                                                                                                                                                                                                                                                                                                                                                                                                                                                                                                                                                                        |
| Quantitative variables       | 11      | Explain how quantitative variables were handled in the analyses. If applicable, describe which groupings were chosen and why                                                                                                                                                                                                                                                                                                                                                                                                                                                                                                                                                                     |
| Statistical methods          | 12      | (a) Describe all statistical methods, including those used to control for confounding<br>(b) Describe any methods used to examine subgroups and interactions<br>(c) Explain how missing data were addressed<br>(d) <i>Cohort study</i> —If applicable, explain how loss to follow-up was addressed<br><i>Case-control study</i> —If applicable, explain how matching of cases and controls was addressed<br><i>Cross-sectional study</i> —If applicable, describe analytical methods taking account of sampling strategy<br>(e) Describe any sensitivity analyses                                                                                                                                |

Continued on next page



1  
2  
3  
4  
5  
6  
7  
8  
9  
10  
11  
12  
13  
14  
15  
16  
17  
18  
19  
20  
21  
22  
23  
24  
25  
26  
27  
28  
29  
30  
31  
32  
33  
34  
35  
36  
37  
38  
39  
40  
41  
42  
43  
44  
45  
46  
47  
48  
49  
50  
51  
52  
53  
54  
55  
56  
57  
58  
59  
60**Results**

|                  |     |                                                                                                                                                                                                                                                                                                                                                                                                               |
|------------------|-----|---------------------------------------------------------------------------------------------------------------------------------------------------------------------------------------------------------------------------------------------------------------------------------------------------------------------------------------------------------------------------------------------------------------|
| Participants     | 13* | (a) Report numbers of individuals at each stage of study—eg numbers potentially eligible, examined for eligibility, confirmed eligible, included in the study, completing follow-up, and analysed<br>(b) Give reasons for non-participation at each stage<br>(c) Consider use of a flow diagram                                                                                                               |
| Descriptive data | 14* | (a) Give characteristics of study participants (eg demographic, clinical, social) and information on exposures and potential confounders<br>(b) Indicate number of participants with missing data for each variable of interest<br>(c) <i>Cohort study</i> —Summarise follow-up time (eg, average and total amount)                                                                                           |
| Outcome data     | 15* | <i>Cohort study</i> —Report numbers of outcome events or summary measures over time<br><i>Case-control study</i> —Report numbers in each exposure category, or summary measures of exposure<br><i>Cross-sectional study</i> —Report numbers of outcome events or summary measures                                                                                                                             |
| Main results     | 16  | (a) Give unadjusted estimates and, if applicable, confounder-adjusted estimates and their precision (eg, 95% confidence interval). Make clear which confounders were adjusted for and why they were included<br>(b) Report category boundaries when continuous variables were categorized<br>(c) If relevant, consider translating estimates of relative risk into absolute risk for a meaningful time period |
| Other analyses   | 17  | Report other analyses done—eg analyses of subgroups and interactions, and sensitivity analyses                                                                                                                                                                                                                                                                                                                |

**Discussion**

|                  |    |                                                                                                                                                                            |
|------------------|----|----------------------------------------------------------------------------------------------------------------------------------------------------------------------------|
| Key results      | 18 | Summarise key results with reference to study objectives                                                                                                                   |
| Limitations      | 19 | Discuss limitations of the study, taking into account sources of potential bias or imprecision. Discuss both direction and magnitude of any potential bias                 |
| Interpretation   | 20 | Give a cautious overall interpretation of results considering objectives, limitations, multiplicity of analyses, results from similar studies, and other relevant evidence |
| Generalisability | 21 | Discuss the generalisability (external validity) of the study results                                                                                                      |

**Other information**

|         |    |                                                                                                                                                               |
|---------|----|---------------------------------------------------------------------------------------------------------------------------------------------------------------|
| Funding | 22 | Give the source of funding and the role of the funders for the present study and, if applicable, for the original study on which the present article is based |
|---------|----|---------------------------------------------------------------------------------------------------------------------------------------------------------------|

\*Give information separately for cases and controls in case-control studies and, if applicable, for exposed and unexposed groups in cohort and cross-sectional studies.

**Note:** An Explanation and Elaboration article discusses each checklist item and gives methodological background and published examples of transparent reporting. The STROBE checklist is best used in conjunction with this article (freely available on the Web sites of PLoS Medicine at <http://www.plosmedicine.org/>, Annals of Internal Medicine at <http://www.annals.org/>, and Epidemiology at <http://www.epidem.com/>). Information on the STROBE Initiative is available at [www.strobe-statement.org](http://www.strobe-statement.org).

# BMJ Open

## Seroprevalence of SARS-CoV-2 in the West Bank region of Palestine: a cross-sectional seroepidemiological study

|                                 |                                                                                                                                                                                                                                                                                                                                                |
|---------------------------------|------------------------------------------------------------------------------------------------------------------------------------------------------------------------------------------------------------------------------------------------------------------------------------------------------------------------------------------------|
| Journal:                        | <i>BMJ Open</i>                                                                                                                                                                                                                                                                                                                                |
| Manuscript ID                   | bmjopen-2020-044552.R1                                                                                                                                                                                                                                                                                                                         |
| Article Type:                   | Original research                                                                                                                                                                                                                                                                                                                              |
| Date Submitted by the Author:   | 08-Dec-2020                                                                                                                                                                                                                                                                                                                                    |
| Complete List of Authors:       | Qutob, Nouar; Arab American University, ; Awartani, Faisal; Arab American University Salah, Zaidoun; Arab American University Asia, Mohammad; Arab American University Abu Khader, Imad; Arab American University Herzallah, Khaled; Arab American University Balqis, Nadeen; Arab American University Sallam, Husam; Arab American University |
| <b>Primary Subject Heading</b>: | Epidemiology                                                                                                                                                                                                                                                                                                                                   |
| Secondary Subject Heading:      | Public health                                                                                                                                                                                                                                                                                                                                  |
| Keywords:                       | COVID-19, IMMUNOLOGY, EPIDEMIOLOGY                                                                                                                                                                                                                                                                                                             |
|                                 |                                                                                                                                                                                                                                                                                                                                                |

SCHOLARONE™  
Manuscripts



I, the Submitting Author has the right to grant and does grant on behalf of all authors of the Work (as defined in the below author licence), an exclusive licence and/or a non-exclusive licence for contributions from authors who are: i) UK Crown employees; ii) where BMJ has agreed a CC-BY licence shall apply, and/or iii) in accordance with the terms applicable for US Federal Government officers or employees acting as part of their official duties; on a worldwide, perpetual, irrevocable, royalty-free basis to BMJ Publishing Group Ltd ("BMJ") its licensees and where the relevant Journal is co-owned by BMJ to the co-owners of the Journal, to publish the Work in this journal and any other BMJ products and to exploit all rights, as set out in our [licence](#).

The Submitting Author accepts and understands that any supply made under these terms is made by BMJ to the Submitting Author unless you are acting as an employee on behalf of your employer or a postgraduate student of an affiliated institution which is paying any applicable article publishing charge ("APC") for Open Access articles. Where the Submitting Author wishes to make the Work available on an Open Access basis (and intends to pay the relevant APC), the terms of reuse of such Open Access shall be governed by a Creative Commons licence – details of these licences and which [Creative Commons](#) licence will apply to this Work are set out in our licence referred to above.

Other than as permitted in any relevant BMJ Author's Self Archiving Policies, I confirm this Work has not been accepted for publication elsewhere, is not being considered for publication elsewhere and does not duplicate material already published. I confirm all authors consent to publication of this Work and authorise the granting of this licence.

1  
2  
3 1  
4  
5 2 **Seroprevalence of SARS-CoV-2** the West Bank region of Palestine **a cross-sectional**  
6  
7 3 **seroepidemiological study**  
8  
9  
10 4

11  
12  
13 5 Nouar Qutob , [Nouar.qutob@aaup.edu](mailto:Nouar.qutob@aaup.edu), Department of Health Sciences, Faculty of Graduate  
14  
15 6 Study, Arab American University, Palestine, phone number: 00970-562000202  
16  
17

18 7 Faisal Awartani, [faisal.awartani@aaup.edu](mailto:faisal.awartani@aaup.edu), Department of Health Sciences, Faculty of Graduate  
19  
20 8 Study, Arab American University, Palestine  
21  
22

23 9 Zaidoun Salah, [zaidoun.salah@aaup.edu](mailto:zaidoun.salah@aaup.edu), Department of Health Sciences, Faculty of Graduate  
24  
25 10 Study, Arab American University, Palestine  
26  
27

28  
29 11 Mohammad Asia, [Mohammad.asia@aaup.edu](mailto:Mohammad.asia@aaup.edu), Faculty of Allied Medical Sciences, Arab  
30  
31 12 American University, Palestine  
32  
33

34 13 Imad Abu Khader, [imad.abukhader@aaup.edu](mailto:imad.abukhader@aaup.edu), Faculty of Allied Medical Sciences, Arab  
35  
36 14 American University, Palestine  
37  
38

39 15 Khaled Herzallah, [khaled.herzallah@aaup.edu](mailto:khaled.herzallah@aaup.edu), Medical Labs, Arab American University,  
40  
41 16 Palestine  
42  
43

44  
45 17 Nadeen Balqis, [Nadeen.Balqis@aaup.edu](mailto:Nadeen.Balqis@aaup.edu), Medical Labs, Arab American University, Palestine  
46  
47

48 18 Husam Sallam, [Husam.sallam@aaup.edu](mailto:Husam.sallam@aaup.edu), Medical Labs, Arab American University, Palestine  
49  
50

51 19  
52  
53  
54  
55  
56  
57  
58  
59  
60

1  
2  
3  
4  
5  
6  
7  
8  
9  
10  
11  
12  
13  
14  
15  
16  
17  
18  
19  
20  
21  
22  
23  
24  
25  
26  
27  
28  
29  
30  
31  
32  
33  
34  
35  
36  
37  
38  
39  
40  
41  
42  
43  
44  
45  
46  
47  
48  
49  
50  
51  
52  
53  
54  
55  
56  
57  
58  
59  
60

20 Correspondence to: Nouar Qutob, Department of Health Sciences, Faculty of Graduate Study,  
21 Arab American University, Palestine

22 Keywords: seroprevalence, Sars-cov-2, Palestine, immunity, covid-19

24 Word count: 2602

For peer review only

1  
2  
3 26  
4  
56 27 **Abstract**7  
8  
9 28 Objectives

10  
11  
12 29 Seroprevalence rates are important indicators to the epidemiology of COVID-19 and the extent of  
13  
14 30 the pandemic given the existence of asymptomatic cases. The purpose of this study is to assess the  
15  
16 31 seroprevalence rate in the Palestinian population residing in the West Bank.  
17  
18  
19

20 32  
21  
22 33 Setting

23  
24  
25 34 The study involved 1355 participants from 11 governorates, including 112 localities in the West  
26  
27 35 Bank, Palestine.  
28  
29

30 36  
31  
32 37 Participants

33  
34  
35 38 Blood samples were collected between 15<sup>th</sup> June 2020 and 30<sup>th</sup> June 2020 from 1355 individuals  
36  
37 39 from randomly selected households in the West Bank in addition to 1136 individuals visiting  
38  
39 40 Palestinian medical laboratories between the 1<sup>st</sup> May 2020 and 9<sup>th</sup> July 2020 for a routine checkup.  
40  
41  
42

43 41  
44  
45 42 Primary and secondary outcome measures

46  
47  
48 43 Out of the 2491 blood samples collected, serological tests for 2455 adequate serum samples were  
49  
50 44 done using an Immunoassay for qualitative detection of antibodies against SARS-CoV-2.  
51  
52 45 seroprevalence was estimated as the proportion of individuals who had a positive result in the total  
53  
54 46 SARS-CoV-2 antibodies in the immunoassay  
55  
56  
57

1  
2  
3 47  
45 48 Results  
6  
7

8 49 The random sample of Palestinians living in the West Bank yielded 0% seroprevalence with 95%  
9  
10 50 and an adjusted confidence interval [0 , 0.0043], while the lab referrals sample yielded an  
11  
12  
13 51 estimated seroprevalence of 0.354% with 95% and an adjusted confidence interval [0.001325  
14  
15 52 , 0.011566].  
16  
17

18 53

19  
20 54 Conclusions  
21  
22

23 55 Our results indicate that as of July 2020, seroprevalence in Palestine persist low and is inadequate  
24  
25 56 to provide herd immunity, emphasizing the need to maintain health measures to keep the outbreak  
26  
27 57 under control. Population-based seroprevalence studies are to be conducted periodically to monitor  
28  
29  
30 58 the SARS-CoV-2 seroprevalence in Palestine and inform policy makers about the efficacy of their  
31  
32 59 surveillance system.  
33  
34

35 60  
36  
3738 61  
39  
40  
41  
42  
43  
44  
45  
46  
47  
48  
49  
50  
51  
52  
53  
54  
55  
56  
57  
58  
59  
60

## 62 **Strengths and limitations of this study**

### 63 Strengths:

- 64 1- The random selection of households residents collected between 15<sup>th</sup> June 2020 and 30<sup>th</sup>  
65 June 2020. The clusters were selected using probability proportional to size (PPS)  
66 sampling.
- 67 2- The study also included 1136 participants from Medicare laboratory referrals between 1<sup>st</sup>  
68 May 2020 and 9<sup>th</sup> July 2020 in 16 branches in the West Bank, which had good  
69 representation of females as well as children

### 70 Limitations:

- 71 1- Low representation in females represented in the random sample, the samples from female  
72 were more difficult to obtain due to a cultural inhibition regarding allowing nurses to enter  
73 the households.
- 74 2- The random sample did not include children under the age of 15 to avoid anxiety due to  
75 fear of needles in the study to eliminate personal fears due to blood withdrawal.
- 76 3- Our study only detected Sars-Cov2 antibodies. However, it is important to recognize that  
77 cellular immunity may play a role in providing immunity against SARS-CoV-2  
78 reinfection<sup>1</sup>. Further studies aimed at testing cellular immunity are important.
- 79 4- It was previously reported that antibodies against SARS-CoV-2 may drop or even  
80 disappear in patients with mild Covid-19, which may have led to the inability to detect  
81 antibodies in a few previously positive cases

82

83



## 84 Introduction

85 Coronavirus disease 2019, known as COVID-19, is an infectious respiratory disease caused by  
86 novel coronavirus SARS-CoV-2<sup>2</sup>. Since its emergence in Wuhan, China in December 2019<sup>3</sup>,  
87 SARS-CoV-2 has spread rapidly around the globe. A global pandemic was declared by the World  
88 Health Organization (WHO)<sup>4,5</sup> and new cases and deaths are being reported daily<sup>6</sup>.

89 Most authorities rely on PCR testing results to estimate number of COVID-19 cases and make up-  
90 to-date decisions<sup>7</sup>. Thus, numbers of patients tested positive for SARS-CoV-2 through PCR  
91 testing, symptomatic patients, those admitted to hospitals, or deceased from Covid-19 are updated  
92 on a daily basis. However, the data may exclude a fraction of the population with previous mild or  
93 asymptomatic COVID-19 that has not been tested by PCR. The proportion of the population who  
94 have overcome the infection without being noticed can probably be approximated by testing for  
95 antibodies against SARS-CoV-2. Antibodies may confer immunity to repeat infection and a high  
96 proportion of immune individuals can attenuate the epidemic. Measures of anti-SARS-CoV-2  
97 seroprevalence can also be used to estimate the clinical impact of COVID-19. To this effect,  
98 several serological surveys of SARS-CoV-2 have been done worldwide<sup>8-17</sup>.

99 Objective:

100 There is lack of data on the the percentage of undiagnosed Palestinian population with previous  
101 mild or asymptomatic COVID-19. Prevalence of COVID-19 infections among Palestinians  
102 residing in the West Bank remains unknown and many are concerned about this uncertainty. To  
103 this end, we conducted a population cross sectional based seroepidemiological study to assess the  
104 spread of SARS-CoV-2 throughout the West Bank. The study included 2491 individuals, designed  
105 to be representative by cities (1355 from randomly selected households and 1136 from laboratory

106 referrals). Elecsys® Anti-SARS-CoV-2 testing was done on 2455 adequate serum samples. Here,  
 107 we describe the study design and the results of the first wave of the study.

## 108 **Methods**

### 109 **Study design and participants**

110 The study conducted is a cross-sectional serologic testing study aimed to investigate seropositivity  
 111 for SARS-CoV-2 in the non-institutionalized Palestinian population residing in the West Bank.

112 The study involved 1355 participants from 11 governorates, including 112 localities  
 113 (supplementary table 1). We used 3-stage cluster sampling to select 1395 households. The cluster  
 114 of households or census track is considered to be a geographic location that is comprised of  
 115 approximately 100 households. The process for conducting cluster sampling was carried as  
 116 follows : (1) Selecting a cluster of households, (2) Selecting 10 households randomly from each  
 117 cluster and (3) Selecting a person at random from the selected household. The clusters were  
 118 selected using probability proportional to size (PPS) sampling (Table 1).

120 Table 1: The PPS sampling algorithm

| Location | # of households in the location | Cumulative |
|----------|---------------------------------|------------|
| L1       | X1                              | C1=X1      |
| L2       | X2                              | C2=X1+X2   |

|      |      |                         |
|------|------|-------------------------|
| L3   | X3   | $C3=X1+X2+X3$           |
| .    | .    | .                       |
| .    | .    | .                       |
| .    | .    | .                       |
| Lk-1 | Xk-1 | $Ck-1=X1+X2+\dots+Xk-1$ |
| Lk   | Xk   | $Ck = X1+X2+\dots+Xk$   |

121

122 To select the number of clusters within each population location: (1) we calculated the sampling  
 123 interval which equals the total number of households divided by the total number of clusters need  
 124 to be selected by the sample say for example (m). So the sampling interval  $SI= N/m$ , where N is  
 125 the total number of households. (2) selected a random number  $R0$  between 0 and SI. (3) calculated  
 126  $Ri$  as  $R0+i*SI$ , a cluster is selected in  $Li$  if  $Ri$  belongs to the interval  $[ Ci-1, Ci]$ .

127 Field work was carried out between 15<sup>th</sup> June 2020 and 30<sup>th</sup> June 2020 by a team of registered  
 128 nurses, laboratory technicians, nursing students and laboratory technician students from the Arab  
 129 American University following standardized health protocols <sup>18</sup>.

130 The study also included 1136 participants from Medicare<sup>®</sup> medical laboratories network referrals  
 131 between 1<sup>st</sup> May 2020 and 9<sup>th</sup> July 2020 in 16 branches in the West Bank (supplementary table 2).

1  
2  
3 132 Participants donated a blood sample for antibodies detection. Blood samples were centrifuged and  
4  
5 133 serum was separated, labelled, stored at -20C at AAUP laboratory until it was used.  
6  
7

### 8 134 **Detection of antibodies**

9  
10  
11 135 Serological tests for 2455 adequate serum samples were done using an Immunoassay for the  
12  
13 136 qualitative detection of antibodies against SARS-CoV-2 (Elecsys<sup>®</sup> Anti-SARS-CoV-2) in human  
14  
15 137 serum by using the Cobas analyzer cobas e 411 (Roche) . The assay uses a recombinant protein  
16  
17 138 representing the nucleocapsid (N) antigen for the determination of antibodies against SARS-CoV-  
18  
19 139 2 with testing time of 18 minutes. We included 6 samples from recovered cases with detected  
20  
21 140 SARS-COV2 antibodies as a positive control.  
22  
23  
24

25 141

### 26 27 142 **Statistical Analysis**

28  
29  
30 143 We estimated seroprevalence as the proportion of individuals who had a positive result in the total  
31  
32 144 SARS-CoV-2 antibodies in the immunoassay.  
33  
34

35  
36 145 We used Wilson Method With Continuity Correction and Boundary Truncation (WCCBT) to  
37  
38 146 construct 95% CI for the population parameter of seroprevalence <sup>19</sup> .  
39  
40

41 147 We calculated the adjusted confidence of interval. Since the specificity of the kit used for the  
42  
43 148 antibodies test is 100% and 83% respectively <sup>20</sup>, we adjusted the confidence interval for  
44  
45 149 seroprevalence according to the following transformation: Adjusted lower confidence limit=  
46  
47 150  $\max[0, \{a-(1-sp)\}/(sp+se-1)]$  and adjusted upper confidence limit= $\min[1, \{b-(1-sp)\}/(sp+se-1)]$   
48  
49  
50 151 .<sup>21</sup>.  
51  
52  
53

54 152

### 153 **Patients and public involvement**

154 The study involved 1355 participants from 11 governorates, including 112 localities and included  
155 1136 participants from Medicare<sup>®</sup> laboratories referrals. The development of the research  
156 question and outcome measures was based on the public priorities to know the seroprevalence in  
157 the Palestinian community. Approval from National ethical committee was obtained  
158 (PHRC/HC/737/20). Written informed consent was obtained from the 1355 study participants and  
159 approvals were obtained from Medicare<sup>®</sup> laboratories for samples to be tested. Participants were  
160 notified of the results of the tests.

### 161 **Results**

162 Of the 1395 eligible individuals residing in households selected using 3-stage cluster sampling,  
163 1355 participants agreed to participate in the study. The proportion of females was lower  
164 compared to males (137, 1218 respectively) including 349 in age group (15-24), 314 in age group  
165 (25-34), 377 in age group (35-49) and 315 in age group (50+). (Figure 1). The majority of the  
166 participants did not report having symptoms in the last three months nor prevailing chronic  
167 diseases (supplementary table 3 and 4). None of the tested specimens revealed presence of  
168 antibodies against SARS-CoV-2. A 95% CI for the population parameter of seroprevalence was  
169 [0.0, 0.0036]. A 95% CI for the population parameter of seroprevalence was [0.0, 0.0036], and an  
170 adjusted confidence interval of [0, 0.0043].

171 Out of the 1355 blood samples collected, 1319 serum samples were adequate for testing. None of  
172 the tested specimens revealed presence of antibodies against SARS-CoV-2. A 95% CI for the  
173 population parameter of seroprevalence was [0,0.0036].

1  
2  
3 174 Of the 1136 participants from Medicare laboratory referrals in 16 branches. The proportion of  
4  
5 175 males was lower than females (395, 741 respectively) including 71 in age group lower less than  
6  
7  
8 176 15, 173 in age group (15-24), 297 tests in age group (25-34), 290 in age group (35-49) and 305  
9  
10 177 in age group (50+) (Figure 2). Records of symptoms and chronic diseases were unattainable. Out  
11  
12 178 of the 1136 tested participants, 3 males, ages 38, 58, 59 and 1 female, age 40 revealed antibodies  
13  
14 179 against SARS-CoV-2, with 95% CI [0.0011,0.0096] and an adjusted confidence interval of  
15  
16  
17 180 [0.001325, 0.011566].  
18  
19

20 181 All serum samples were adequate for testing. Out of the 1136 tested participants, 4 revealed  
21  
22 182 antibodies against Sars-CoV-2 with 95% CI [0.0011,0096].  
23  
24  
25  
26 183  
27

## 28 184 **Discussion**

30  
31  
32 185 To our knowledge, this is the first SARS-CoV-2 seroprevalence study in Palestine. The findings  
33  
34 186 from this seroprevalence study for SARS-CoV-2 indicate that the estimated seroprevalence of the  
35  
36 187 total SARS-CoV-2 antibodies persist low as of mid of June. The random sample of Palestinians  
37  
38 188 living in the West Bank yielded 0% seroprevalence with 95% and an adjusted confidence interval  
39  
40 189 of [0, 0.0043], while the lab referrals sample yielded an estimated seroprevalence of 0.354% with  
41  
42  
43 190 95% and an adjusted confidence [0.001325, 0.011566].  
44  
45

46 191 The low SARS-CoV-2 antibody prevalence in our population can be explained by the imposed  
47  
48 192 total lockdown in the first three months when cases were under control and only reached around  
49  
50  
51 193 800 cases by May. Seroprevalence in Palestine is very close to that identified in Jordan (0%  
52  
53 194 prevalence)<sup>16</sup>, a neighboring country, which was explained to be due to the strict closures  
54  
55  
56 195 implemented by the Jordanian government and the eventual curtailing of infections in Jordan.  
57

1  
2  
3 196 Also, Seroprevalence in Maine and Montana was 0.4% and 0.5% respectively by end of August  
4  
5 197 2020<sup>22</sup>. In comparison to other countries like Spain, Italy, Japan India, Los Angeles, Germany,  
6  
7 198 Switzerland the seroprevalence in Palestine is low<sup>8-17</sup>. Similarly, the seroprevalence among  
9  
10 199 Palestinians residing in the West Bank was shown to be lower than that in Israel as reported in the  
11  
12 200 first conducted serological study of 1,700 tests. The study suggested that 2.5 percent of the Israeli  
13  
14 201 population, have had the coronavirus<sup>23</sup>. It is, however, noteworthy that a comparison with other  
15  
16 202 countries may be problematic due to the timing and the stage of the pandemic which may vary  
17  
18 203 affecting the seroprevalence estimates.  
19  
20  
21  
22  
23 204

24  
25  
26 205 A key strength of our study is the random selection of household's residents collected between  
27  
28 206 15<sup>th</sup> June 2020 and 30<sup>th</sup> June 2020. The clusters were selected using probability proportional to  
29  
30 207 size (PPS) sampling. This technique ensures getting self-weighting sample which can be used to  
31  
32 208 produce unbiased estimators for the parameters of interest. However, samples from females were  
33  
34 209 more difficult to obtain due to a cultural inhibition regarding allowing nurses to enter the  
35  
36 210 households. Also, random samples did not include children under the age of 15 to avoid anxiety  
37  
38 211 due to fear of needles in the study to eliminate personal fears due to blood withdrawal.  
39  
40  
41  
42

43 212 As for the lab referrals sample, it represents the population of the lab referrals between the 1st May  
44  
45 213 2020 and 9th July 2020. The seroprevalence in this sample was 4 positive cases out of the 1136  
46  
47 214 samples tested. Since the seroprevalence within the lab referral population is close to zero, we  
48  
49 215 used Wislon Method With Continuity Correction and Truncation (WCCBT) to construct a 95%  
50  
51 216 confidence interval for the population parameter of seroprevalence [0.0011,0096]. In comparison  
52  
53 217 to household samples that were collected between 15th-30th of June, laboratory referral samples  
54  
55  
56  
57  
58  
59  
60

1  
2  
3 218 include a good representation of females and children below the age of 15 (Figure 2). Also, samples  
4  
5 219 were collected starting from May 1st, which may better represent the small peaks of SARS-CoV-  
6  
7  
8 220 2 reported cases in Palestine and thus explain the presence of few positive samples in comparison  
9  
10 221 to null in household samples.

11  
12  
13 222 Our study only detected SARS-CoV-2 antibodies. It was previously reported that antibodies  
14  
15 223 against SARS-CoV-2 may drop or even disappear in patients with mild Covid-19, which may have  
16  
17  
18 224 led to the inability to detect antibodies in a few previously positive cases<sup>24,25</sup>. Also, it is important  
19  
20 225 to recognize that cellular immunity may play a role in providing immunity against SARS-CoV-2  
21  
22 226 reinfection<sup>18</sup>. Further studies aimed at testing cellular immunity are important. It is also noteworthy  
23  
24  
25 227 that previous studies have indicated that asymptomatic individuals were reported to have a weaker  
26  
27 228 immune response to SARS-CoV-2 infection and a higher percentage of asymptomatic individuals  
28  
29 229 became seronegative when compared to symptomatic individuals in the early recovering phases.  
30  
31 230 The reduction in neutralizing antibody levels may have implications for immunity strategy and  
32  
33  
34 231 serological surveys<sup>26,27</sup>.

35  
36  
37 232 In conclusion, our study provides estimates of SARS-CoV-2 seroprevalence in Palestine. Our  
38  
39 233 results reflect the seroprevalence as of mid of June. It is noteworthy that on May 25<sup>th</sup>, the  
40  
41 234 government of Palestine eased the restrictions following a decline in cases which led to a surge in  
42  
43  
44 235 cases beginning of July, with the epicenter of the epidemic in Hebron accounting for over 70 % of  
45  
46 236 active cases implying a possible increase in seroprevalence after July. In this situation, health  
47  
48  
49 237 measures have to be taken to keep the outbreak under control. In order to monitor the SARS-CoV-  
50  
51 238 2 seroprevalence in Palestine and inform policy makers about the efficacy of their surveillance  
52  
53  
54 239 system, conducting population-based seroprevalence studies on a regular basis is important.



1  
2  
3 2404  
5  
6 2417  
8  
9 **242 Acknowledgment**10  
11  
12 243 We thank the participants for their cooperation.13  
14  
15 244 We thank the registered nurses, laboratory technicians, nursing students and laboratory16  
17  
18 245 technician students from the Arab American University: Ahmad Hodrub, Mohammad Faisal,19  
20 246 Wajdi Tu`ma , Adam Maraw`a, Sharhabeel Nasrallah, Hisham Zahran and Mohammad Barakat21  
22  
23 247 We thank Medicare labs for providing blood samples of individuals visiting their laboratories.24  
25  
26 24827  
28  
29 **249 Conflict of Interest Disclosures**30  
31  
32 250 No authors reported disclosures.33  
34  
35 25136  
37  
38 **252 Funding/Support**39  
40  
41 253 The study was funded by the Arab American University.42  
43  
44 25445  
46  
47 **255 Authors contribution**48  
49  
50 256 Research design: Nouar Qutob, Zaidoun Salah, Faisal Awartani51  
52  
53 257 Field work coordination: Mohammad Asia, Imad Abu Khader54  
55  
56 258 Data analysis: Faisal Awartani

1  
2  
3 259 Manuscript writing: Nouar Qutob  
4  
5

6 260 Manuscript revisions: Nouar Qutob, Faisal Awartani, Zaidoun Salah, Mohammad Asia  
7  
8

9 261 Methodology and lab work: Nouar Qutob, Khaled Herzallah, Nadeen Balqis, Husam Sallam  
10  
11

12 262  
13  
14

### 15 263 **Data sharing**

16  
17  
18 264 Data are available upon reasonable request  
19  
20

21 265  
22  
23

### 24 266 **Figure Legends**

25  
26  
27 267 Figure 1: (a) Age and (b) gender distribution of the 1355 participants from Palestinian  
28  
29 268 households in the West Bank. Blood samples were collected between 15<sup>th</sup> June 2020 and 30<sup>th</sup>  
30  
31 269 June from the participants.  
32  
33

34 270 Figure 2: (a) Age and (b) Gender distribution of the 1136 participants visiting Medicare  
35  
36 271 laboratories between the 1<sup>st</sup> May 2020 and 9<sup>th</sup> July 2020 for a routine checkup.  
37  
38

39 272  
40  
41

### 42 273 **References**

- 43  
44  
45 274 1. Sekine T, Perez-Potti A, Rivera-Ballesteros O, et al. Robust T cell immunity in  
46  
47  
48 275 convalescent individuals with asymptomatic or mild COVID-19. *bioRxiv*.  
49  
50 276 2020:2020.06.29.174888. doi:10.1101/2020.06.29.174888  
51  
52  
53 277 2. Mayo clinic. oronavirus disease 2019 (COVID-19).  
54  
55  
56  
57  
58  
59  
60

- 1  
2  
3 278 3. Lu H, Stratton CW, Tang YW. Outbreak of pneumonia of unknown etiology in Wuhan,  
4  
5 279 China: The mystery and the miracle. *J Med Virol*. 2020;92(4):401-402.  
6  
7  
8 280 doi:10.1002/jmv.25678  
9  
10  
11 281 4. World Health Organization. *Novel Coronavirus(2019-NCoV), Situation Report - 12.*;  
12  
13 282 2020.  
14  
15  
16 283 5. Hui DS, I Azhar E, Madani TA, Ntoumi F, Kock R, Dar O et al. The continuing 2019-  
17  
18 284 nCoV epidemic threat of novel coronaviruses to global health — The latest 2019 novel  
19  
20 285 coronavirus outbreak in Wuhan, China The. 2020;(January).  
21  
22  
23 286 6. COVID-19 Dashboard by the Center for Systems Science and Engineering (CSSE) at  
24  
25 287 Johns Hopkins University (JHU).  
26  
27  
28  
29 288 7. Onder G, Rezza G, Brusaferro S. Case-Fatality Rate and Characteristics of Patients Dying  
30  
31 289 in Relation to COVID-19 in Italy. *JAMA - J Am Med Assoc*. 2020;2019:2019-2020.  
32  
33 290 doi:10.1001/jama.2020.4683  
34  
35  
36 291 8. Snoeck CJ, Vaillant M, Abdelrahman T, et al. Prevalence of SARS-CoV-2 infection in the  
37  
38 292 Luxembourgish population the CON-VINCE study. *Medrxiv*. 2020:2020.05.11.20092916.  
39  
40 293 doi:10.1101/2020.05.11.20092916  
41  
42  
43  
44 294 9. Wu X, Fu B, Chen L, Feng Y. Serological tests facilitate identification of asymptomatic  
45  
46 295 SARS-CoV-2 infection in Wuhan, China. *J Med Virol*. 2020:2-3. doi:10.1002/jmv.25904  
47  
48  
49 296 10. Bryan A, Pepper G, Wener MH, et al. Performance Characteristics of the Abbott Architect  
50  
51 297 SARS-CoV-2 IgG Assay and Seroprevalence in Boise, Idaho. *J Clin Microbiol*.  
52  
53 298 2020;(May). doi:10.1128/JCM.00941-20  
54  
55  
56  
57  
58  
59  
60

- 1  
2  
3 299 11. Stringhini S, Wisniak A, Piumatti G, et al. Repeated seroprevalence of anti-SARS-CoV-2  
4  
5 300 IgG antibodies in a population-based sample from Geneva, Switzerland. *medRxiv*.  
6  
7 301 2020:2020.05.02.20088898. doi:10.1101/2020.05.02.20088898  
8  
9  
10 302 12. Valenti L, Bergna A, Pelusi S, et al. SARS-CoV-2 seroprevalence trends in healthy blood  
11  
12 303 donors during the COVID-19 Milan outbreak. *medRxiv*. 2020:2020.05.11.20098442.  
13  
14 304 doi:10.1101/2020.05.11.20098442  
15  
16  
17 305 13. Shakiba M, Hashemi Nazari SS, Mehrabian F, Rezvani SM, Ghasempour Z, Heidarzadeh  
18  
19 306 A. Seroprevalence of COVID-19 virus infection in Guilan province, Iran. *medRxiv*.  
20  
21 307 2020:2020.04.26.20079244. doi:10.1101/2020.04.26.20079244  
22  
23  
24  
25 308 14. Pollán M, Pérez-Gómez B, Pastor-Barriuso R, et al. Prevalence of SARS-CoV-2 in Spain  
26  
27 309 (ENE-COVID): a nationwide, population-based seroepidemiological study. *Lancet*  
28  
29 310 (*London, England*). 2020;6736(20):1-11. doi:10.1016/S0140-6736(20)31483-5  
30  
31  
32  
33 311 15. Stadlbauer D, Amanat F, Chromikova V, et al. SARS-CoV-2 Seroconversion in Humans:  
34  
35 312 A Detailed Protocol for a Serological Assay, Antigen Production, and Test Setup. *Curr*  
36  
37 313 *Protoc Microbiol*. 2020;57(1):2425-2427. doi:10.1002/cpmc.100  
38  
39  
40  
41 314 16. Sughayer MA, Mansour A, Nuirat A Al, Souan L, Ghanem M, Siag M. Covid-19  
42  
43 315 Seroprevalence rate in healthy blood donors from a community under strict lockdown  
44  
45 316 measures. *medRxiv*. 2020:2020.06.06.20123919. doi:10.1101/2020.06.06.20123919  
46  
47  
48  
49 317 17. Hains DS, Schwaderer AL, Carroll AE, Starr MC, Wilson AC. Seroprevalence of SARS-  
50  
51 318 CoV-2 – Specific Antibodies Among Adults in Los Angeles County , California , on April  
52  
53 319 10-11 , 2020. 2020;323(23):2425-2427. doi:10.1002/cpmc.100  
54  
55  
56  
57  
58  
59  
60

- 1  
2  
3 320 18. World Health Organization. Ethical standards for research during public health  
4  
5 321 emergencies: distilling existing guidance to support COVID-19. *Ethical Stand Res Dur*  
6  
7 322 *public Heal emergencies Distill Exist Guid to Support COVID-19 R&D*. 2020:1-4.  
8  
9  
10 323 19. Sakthivel Sivam SM. Everything or Nothing - A Better Confidence Intervals for Binomial  
11  
12 324 Proportion in Clinical Trial Data Analysis . Sakthivel Sivam , Quartesian LLC , Princeton  
13  
14 325 , New Jersey Subbiah Meenakshisundaram , L . N Government College , Ponneri , India.  
15  
16 326 2016;(2014).  
17  
18  
19  
20 327 20. Mahase E. Covid-19: Two antibody tests are “highly specific” but vary in sensitivity,  
21  
22 328 evaluations find. *BMJ*. 2020;369(May):m2066. doi:10.1136/bmj.m2066  
23  
24  
25  
26 329 21. Diggle PJ. Estimating Prevalence Using an Imperfect Test. *Epidemiol Res Int*.  
27  
28 330 2011;2011:1-5. doi:10.1155/2011/608719  
29  
30  
31 331 22. COVID-19 Case Surveillance Public Use Data. [https://covid.cdc.gov/covid-data-](https://covid.cdc.gov/covid-data-tracker/#national-lab)  
32  
33 332 [tracker/#national-lab](https://covid.cdc.gov/covid-data-tracker/#national-lab).  
34  
35  
36 333 23. [https://www.jpost.com/israel-news/coronavirus-herd-immunity-not-in-israel-according-to-](https://www.jpost.com/israel-news/coronavirus-herd-immunity-not-in-israel-according-to-a-serological-study-630059)  
37  
38 334 [a-serological-study-630059](https://www.jpost.com/israel-news/coronavirus-herd-immunity-not-in-israel-according-to-a-serological-study-630059).  
39  
40  
41 335 24. Ibarrondo FJ, Fulcher JA, Goodman-Meza D, et al. Rapid Decay of Anti–SARS-CoV-2  
42  
43 336 Antibodies in Persons with Mild Covid-19. *N Engl J Med*. 2020:1-2.  
44  
45 337 doi:10.1056/nejmc2025179  
46  
47  
48  
49 338 25. Bölke E, Matuschek C, Fischer JC. Loss of Anti–SARS-CoV-2 Antibodies in Mild Covid-  
50  
51 339 19. *N Engl J Med*. 2020;383(17):1694-1698. doi:10.1056/nejmc2028468  
52  
53  
54 340 26. Zhao J, Yuan Q, Wang H, et al. Antibody responses to SARS-CoV-2 in patients of novel  
55  
56  
57  
58  
59  
60

1  
2  
3 341 coronavirus disease 2019. *Clin Infect Dis*. 2020;(M):2-3. doi:10.1093/cid/ciaa344  
4

5  
6 342 27. Wu LP, Wang NC, Chang YH, et al. Duration of antibody responses after severe acute  
7

8 343 respiratory syndrome. *Emerg Infect Dis*. 2007;13(10):1562-1564.  
9

10 344 doi:10.3201/eid1310.070576  
11  
12

13  
14 345  
15

16  
17 346  
18

19  
20 347  
21  
22  
23  
24  
25  
26  
27  
28  
29  
30  
31  
32  
33  
34  
35  
36  
37  
38  
39  
40  
41  
42  
43  
44  
45  
46  
47  
48  
49  
50  
51  
52  
53  
54  
55  
56  
57  
58  
59  
60

1  
2  
3  
4  
5  
6  
7  
8  
9  
10  
11  
12  
13  
14  
15  
16  
17  
18  
19  
20  
21  
22  
23  
24  
25  
26  
27  
28  
29  
30  
31  
32  
33  
34  
35  
36  
37  
38  
39  
40  
41  
42  
43  
44  
45  
46  
47  
48  
49  
50  
51  
52  
53  
54  
55  
56  
57  
58  
59  
60

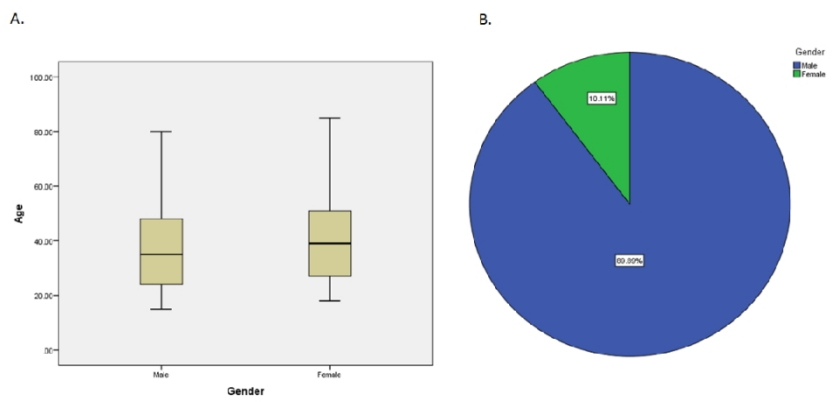

Figure 1  
Caption : (a) Age and (b) gender distribution of the 1355 participants from Palestinian households in the West Bank. Blood samples were collected between 15th June 2020 and 30th June from the participants.

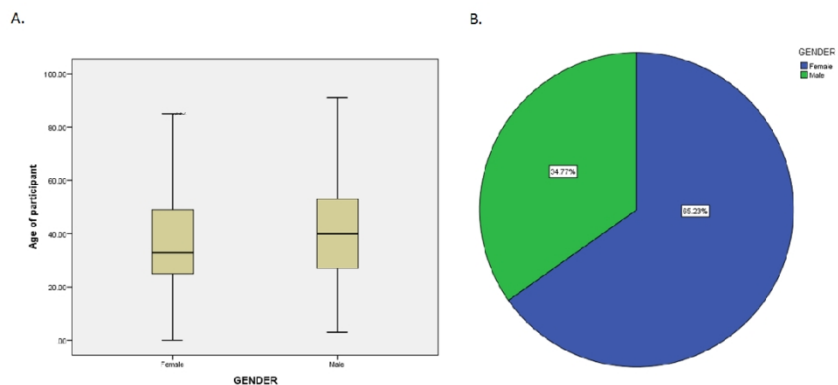

Figure 2

Caption : (a) Age and (b) Gender distribution of the 1136 participants visiting Medicare laboratories between the 1st May 2020 and 9th July 2020 for a routine checkup.



Supplementary Table 1: Governorates and localities included in the households sample

| <b>Governorate</b> | <b>Locality</b>        |
|--------------------|------------------------|
| Jenin              | Sir                    |
| Jenin              | Anza                   |
| Jenin              | Al Araqa               |
| Jenin              | Al Mughayyir           |
| Jenin              | Al Fandaqumiya         |
| Jenin              | Al Judeida             |
| Jenin              | Ajja                   |
| Jenin              | Birqin                 |
| Jenin              | Meithalun              |
| Jenin              | Jaba                   |
| Jenin              | Silat al Harithiya     |
| Jenin              | Arraba                 |
| Jenin              | Yabad                  |
| Jenin              | Al Yamun               |
| Jenin              | Qabatiya               |
| Jenin              | Jenin                  |
| Tubas              | Ras al Faraa           |
| Tubas              | Aqqaba                 |
| Tubas              | Tammun                 |
| Tubas              | Tubas                  |
| Tulkarm            | Kafa                   |
| Tulkarm            | Kafr Jammal            |
| Tulkarm            | Kafr al Labad          |
| Tulkarm            | Nur Shams Camp         |
| Tulkarm            | Bala                   |
| Tulkarm            | Tulkarm Camp           |
| Tulkarm            | Attil                  |
| Tulkarm            | Tulkarm                |
| Nablus             | Iraq Burin             |
| Nablus             | Qusin                  |
| Nablus             | As Sawiya              |
| Nablus             | Majdal Bani Fadil      |
| Nablus             | Sabastiya              |
| Nablus             | Ein Beit el Ma Camp    |
| Nablus             | Beit Dajan             |
| Nablus             | Qusra                  |
| Nablus             | Askar Camp )al Qadeem( |
| Nablus             | Awarta                 |
| Nablus             | Asira ash Shamaliya    |
| Nablus             | Aqraba                 |

|                     |                    |
|---------------------|--------------------|
| Nablus              | Beit Furik         |
| Nablus              | Balata Camp        |
| Nablus              | Nablus             |
| Qalqiliya           | Kafr Laqif         |
| Qalqiliya           | Jinsafut           |
| Qalqiliya           | Sanniriya          |
| Qalqiliya           | Azzun              |
| Qalqiliya           | Qalqiliya          |
| Salfit              | Deir Istiya        |
| Salfit              | Haris              |
| Salfit              | Biddya             |
| Salfit              | Salfit             |
| Ramallah & Al-Bireh | Shabtin            |
| Ramallah & Al-Bireh | Ein Arik           |
| Ramallah & Al-Bireh | Beitin             |
| Ramallah & Al-Bireh | Ein Yabrud         |
| Ramallah & Al-Bireh | Arura              |
| Ramallah & Al-Bireh | Beitillu           |
| Ramallah & Al-Bireh | Deir Abu Mashaal   |
| Ramallah & Al-Bireh | Khirbet Abu Falah  |
| Ramallah & Al-Bireh | Beit Ur at Tahta   |
| Ramallah & Al-Bireh | Shuqba             |
| Ramallah & Al-Bireh | Qibya              |
| Ramallah & Al-Bireh | Al Jalazun Camp    |
| Ramallah & Al-Bireh | Beituniya          |
| Ramallah & Al-Bireh | Ramallah           |
| Ramallah & Al-Bireh | Al Bireh           |
| Jericho & Al-Aghwar | Ein as Sultan Camp |
| Jericho & Al-Aghwar | Jericho )Ariha(    |
| Jerusalem           | Ash Sheikh Sad     |

|    |           |                       |
|----|-----------|-----------------------|
| 1  |           |                       |
| 2  |           |                       |
| 3  | Jerusalem | Beit Surik            |
| 4  |           |                       |
| 5  | Jerusalem | As Sawahira ash       |
| 6  |           | Sharqiya              |
| 7  | Jerusalem | Hizma                 |
| 8  | Jerusalem | Qalandiya Camp        |
| 9  |           |                       |
| 10 | Jerusalem | Ar Ram & Dahiyat al   |
| 11 |           | Bareed                |
| 12 | Jerusalem | Anata                 |
| 13 | Jerusalem | Al Eizariya           |
| 14 | Bethlehem | Al Masara             |
| 15 | Bethlehem | Wadi Rahhal           |
| 16 | Bethlehem | Dar Salah             |
| 17 | Bethlehem | Husan                 |
| 18 | Bethlehem | Hindaza and Bureidaa  |
| 19 | Bethlehem | Nahhalin              |
| 20 | Bethlehem | Ad Duheisha Camp      |
| 21 | Bethlehem | Ad Doha               |
| 22 | Bethlehem | Beit Sahur            |
| 23 | Bethlehem | Beit Jala             |
| 24 | Bethlehem | Beit Fajjar           |
| 25 | Bethlehem | Bethlehem (Beit Lahm) |
| 26 | Hebron    | An Najada             |
| 27 | Hebron    | Beit ar Rush al Fauqa |
| 28 | Hebron    | Shuyukh al Arrub      |
| 29 | Hebron    | Al Burj and Al Bira   |
| 30 | Hebron    | Nuba                  |
| 31 | Hebron    | Al Fawwar Camp        |
| 32 | Hebron    | Beit Kahil            |
| 33 | Hebron    | Kharas                |
| 34 | Hebron    | Beit Awwa             |
| 35 | Hebron    | Beit Ula              |
| 36 | Hebron    | Taffuh                |
| 37 | Hebron    | Beit Ummar            |
| 38 | Hebron    | Surif                 |
| 39 | Hebron    | Tarqumiya             |
| 40 | Hebron    | Sair                  |
| 41 | Hebron    | Bani Naim             |
| 42 | Hebron    | Idhna                 |
| 43 | Hebron    | As Samu               |
| 44 | Hebron    | Halhul                |
| 45 | Hebron    | Adahiriya             |
| 46 | Hebron    | Dura                  |
| 47 | Hebron    | Yatta                 |
| 48 |           |                       |
| 49 |           |                       |
| 50 |           |                       |
| 51 |           |                       |
| 52 |           |                       |
| 53 |           |                       |
| 54 |           |                       |
| 55 |           |                       |
| 56 |           |                       |
| 57 |           |                       |
| 58 |           |                       |
| 59 |           |                       |
| 60 |           |                       |

|        |                    |
|--------|--------------------|
| Hebron | Hebron (Al Khalil) |
|--------|--------------------|

For peer review only

Supplementary Table 2: Governorates and localities included in the lab referrals sample

| <b>Governorate</b> | <b>Locality</b>    |
|--------------------|--------------------|
| Jericho            | Jericho            |
| Hebron             | Dura               |
| Hebron             | Yatta              |
| Hebron             | Hebron (Al Khalil) |
| Hebron             | Adahiriya          |
| Bethany            | Bethany            |
| Bethlehem          | Bethlehem          |
| Jenin              | Jenin              |
| Ramallah           | Ramallah           |
| Ramallah           | Silwad             |
| Tubas              | Tubas              |
| Tulkarem           | Tulkarem           |
| Qalqiliah          | Qalqiliah          |
| Nablus             | Nablus             |
| Salfit             | Bidia              |
| Salfit             | Salfit             |

Supplementary Table 3: Prevalence of symptoms reported by participants

| Symptom   | Yes<br>N=1355 | No<br>N=1355 | Don't Know<br>N=1355 |
|-----------|---------------|--------------|----------------------|
| Fever     | 3.8%          | 95.4%        | .8%                  |
| Sneezing  | 6.8%          | 92.4%        | .8%                  |
| Dry Cough | 5.7%          | 93.5%        | .8%                  |
| Vomiting  | 1.1%          | 98.1%        | .8%                  |

|                                                  |      |       |     |
|--------------------------------------------------|------|-------|-----|
| Sore and red throat                              | 4.3% | 94.9% | .8% |
| Diarrhea                                         | 2.0% | 97.2% | .8% |
| Muscle ache                                      | 3.2% | 95.9% | .9% |
| Nasal Congestion                                 | 2.8% | 96.3% | .8% |
| Skin rash or change in color of the thumb or toe | 1.2% | 97.9% | .9% |
| Loss of sense of taste and smell                 | .7%  | 98.5% | .8% |
| Chest pain                                       | 1.7% | 97.6% | .8% |
| Difficulty breathing                             | 1.8% | 97.4% | .8% |
| Loss of ability to speak or move                 | .6%  | 98.7% | .8% |

Supplementary Table 4: Prevalence of chronic diseases reported by participants

| Chronic Disease | Yes<br>N=1355 | No<br>N=1355 | Don't Know<br>N=1355 |
|-----------------|---------------|--------------|----------------------|
| Heart disease   | 5.1%          | 94.9%        | 0.0%                 |

|                                        |       |       |      |
|----------------------------------------|-------|-------|------|
| Blood pressure                         | 11.9% | 88.1% | 0.0% |
| Cancer                                 | .2%   | 99.8% | .0%  |
| Kidney disease                         | .7%   | 99.2% | .1%  |
| Nervous system disease                 | .7%   | 99.3% | 0.0% |
| Diabetes                               | 10.1% | 89.9% | 0.0% |
| Respiratory disease (Asthma)           | 4.4%  | 95.5% | .0%  |
| Hospitalized through the past 6 months | 4.2%  | 95.8% | .0%  |
| On immunosuppressant drug?             | 1.2%  | 98.8% | 0.0% |

## STROBE Statement—checklist of items that should be included in reports of observational studies

|                              | Item No | Recommendation                                                                                                                                                                                                                                                                                                                                                                                                                                                                                                                                                                                                                                                                                   |
|------------------------------|---------|--------------------------------------------------------------------------------------------------------------------------------------------------------------------------------------------------------------------------------------------------------------------------------------------------------------------------------------------------------------------------------------------------------------------------------------------------------------------------------------------------------------------------------------------------------------------------------------------------------------------------------------------------------------------------------------------------|
| <b>Title and abstract</b>    | 1       | (a) Indicate the study's design with a commonly used term in the title or the abstract<br>(b) Provide in the abstract an informative and balanced summary of what was done and what was found                                                                                                                                                                                                                                                                                                                                                                                                                                                                                                    |
| <b>Introduction</b>          |         |                                                                                                                                                                                                                                                                                                                                                                                                                                                                                                                                                                                                                                                                                                  |
| Background/rationale         | 2       | Explain the scientific background and rationale for the investigation being reported                                                                                                                                                                                                                                                                                                                                                                                                                                                                                                                                                                                                             |
| Objectives                   | 3       | State specific objectives, including any prespecified hypotheses                                                                                                                                                                                                                                                                                                                                                                                                                                                                                                                                                                                                                                 |
| <b>Methods</b>               |         |                                                                                                                                                                                                                                                                                                                                                                                                                                                                                                                                                                                                                                                                                                  |
| Study design                 | 4       | Present key elements of study design early in the paper                                                                                                                                                                                                                                                                                                                                                                                                                                                                                                                                                                                                                                          |
| Setting                      | 5       | Describe the setting, locations, and relevant dates, including periods of recruitment, exposure, follow-up, and data collection                                                                                                                                                                                                                                                                                                                                                                                                                                                                                                                                                                  |
| Participants                 | 6       | (a) <i>Cohort study</i> —Give the eligibility criteria, and the sources and methods of selection of participants. Describe methods of follow-up<br><i>Case-control study</i> —Give the eligibility criteria, and the sources and methods of case ascertainment and control selection. Give the rationale for the choice of cases and controls<br><i>Cross-sectional study</i> —Give the eligibility criteria, and the sources and methods of selection of participants<br>(b) <i>Cohort study</i> —For matched studies, give matching criteria and number of exposed and unexposed<br><i>Case-control study</i> —For matched studies, give matching criteria and the number of controls per case |
| Variables                    | 7       | Clearly define all outcomes, exposures, predictors, potential confounders, and effect modifiers. Give diagnostic criteria, if applicable                                                                                                                                                                                                                                                                                                                                                                                                                                                                                                                                                         |
| Data sources/<br>measurement | 8*      | For each variable of interest, give sources of data and details of methods of assessment (measurement). Describe comparability of assessment methods if there is more than one group                                                                                                                                                                                                                                                                                                                                                                                                                                                                                                             |
| Bias                         | 9       | Describe any efforts to address potential sources of bias                                                                                                                                                                                                                                                                                                                                                                                                                                                                                                                                                                                                                                        |
| Study size                   | 10      | Explain how the study size was arrived at                                                                                                                                                                                                                                                                                                                                                                                                                                                                                                                                                                                                                                                        |
| Quantitative variables       | 11      | Explain how quantitative variables were handled in the analyses. If applicable, describe which groupings were chosen and why                                                                                                                                                                                                                                                                                                                                                                                                                                                                                                                                                                     |
| Statistical methods          | 12      | (a) Describe all statistical methods, including those used to control for confounding<br>(b) Describe any methods used to examine subgroups and interactions<br>(c) Explain how missing data were addressed<br>(d) <i>Cohort study</i> —If applicable, explain how loss to follow-up was addressed<br><i>Case-control study</i> —If applicable, explain how matching of cases and controls was addressed<br><i>Cross-sectional study</i> —If applicable, describe analytical methods taking account of sampling strategy<br>(e) Describe any sensitivity analyses                                                                                                                                |

Continued on next page



1  
2  
3  
4  
5  
6  
7  
8  
9  
10  
11  
12  
13  
14  
15  
16  
17  
18  
19  
20  
21  
22  
23  
24  
25  
26  
27  
28  
29  
30  
31  
32  
33  
34  
35  
36  
37  
38  
39  
40  
41  
42  
43  
44  
45  
46  
47  
48  
49  
50  
51  
52  
53  
54  
55  
56  
57  
58  
59  
60**Results**

|                  |     |                                                                                                                                                                                                                                                                                                                                                                                                               |
|------------------|-----|---------------------------------------------------------------------------------------------------------------------------------------------------------------------------------------------------------------------------------------------------------------------------------------------------------------------------------------------------------------------------------------------------------------|
| Participants     | 13* | (a) Report numbers of individuals at each stage of study—eg numbers potentially eligible, examined for eligibility, confirmed eligible, included in the study, completing follow-up, and analysed<br>(b) Give reasons for non-participation at each stage<br>(c) Consider use of a flow diagram                                                                                                               |
| Descriptive data | 14* | (a) Give characteristics of study participants (eg demographic, clinical, social) and information on exposures and potential confounders<br>(b) Indicate number of participants with missing data for each variable of interest<br>(c) <i>Cohort study</i> —Summarise follow-up time (eg, average and total amount)                                                                                           |
| Outcome data     | 15* | <i>Cohort study</i> —Report numbers of outcome events or summary measures over time<br><i>Case-control study</i> —Report numbers in each exposure category, or summary measures of exposure<br><i>Cross-sectional study</i> —Report numbers of outcome events or summary measures                                                                                                                             |
| Main results     | 16  | (a) Give unadjusted estimates and, if applicable, confounder-adjusted estimates and their precision (eg, 95% confidence interval). Make clear which confounders were adjusted for and why they were included<br>(b) Report category boundaries when continuous variables were categorized<br>(c) If relevant, consider translating estimates of relative risk into absolute risk for a meaningful time period |
| Other analyses   | 17  | Report other analyses done—eg analyses of subgroups and interactions, and sensitivity analyses                                                                                                                                                                                                                                                                                                                |

**Discussion**

|                  |    |                                                                                                                                                                            |
|------------------|----|----------------------------------------------------------------------------------------------------------------------------------------------------------------------------|
| Key results      | 18 | Summarise key results with reference to study objectives                                                                                                                   |
| Limitations      | 19 | Discuss limitations of the study, taking into account sources of potential bias or imprecision. Discuss both direction and magnitude of any potential bias                 |
| Interpretation   | 20 | Give a cautious overall interpretation of results considering objectives, limitations, multiplicity of analyses, results from similar studies, and other relevant evidence |
| Generalisability | 21 | Discuss the generalisability (external validity) of the study results                                                                                                      |

**Other information**

|         |    |                                                                                                                                                               |
|---------|----|---------------------------------------------------------------------------------------------------------------------------------------------------------------|
| Funding | 22 | Give the source of funding and the role of the funders for the present study and, if applicable, for the original study on which the present article is based |
|---------|----|---------------------------------------------------------------------------------------------------------------------------------------------------------------|

\*Give information separately for cases and controls in case-control studies and, if applicable, for exposed and unexposed groups in cohort and cross-sectional studies.

**Note:** An Explanation and Elaboration article discusses each checklist item and gives methodological background and published examples of transparent reporting. The STROBE checklist is best used in conjunction with this article (freely available on the Web sites of PLoS Medicine at <http://www.plosmedicine.org/>, Annals of Internal Medicine at <http://www.annals.org/>, and Epidemiology at <http://www.epidem.com/>). Information on the STROBE Initiative is available at [www.strobe-statement.org](http://www.strobe-statement.org).

# BMJ Open

## Seroprevalence of SARS-CoV-2 the West Bank region of Palestine: a cross-sectional seroepidemiological study

|                                 |                                                                                                                                                                                                                                                                                                                                                |
|---------------------------------|------------------------------------------------------------------------------------------------------------------------------------------------------------------------------------------------------------------------------------------------------------------------------------------------------------------------------------------------|
| Journal:                        | <i>BMJ Open</i>                                                                                                                                                                                                                                                                                                                                |
| Manuscript ID                   | bmjopen-2020-044552.R2                                                                                                                                                                                                                                                                                                                         |
| Article Type:                   | Original research                                                                                                                                                                                                                                                                                                                              |
| Date Submitted by the Author:   | 06-Jan-2021                                                                                                                                                                                                                                                                                                                                    |
| Complete List of Authors:       | Qutob, Nouar; Arab American University, ; Awartani, Faisal; Arab American University Salah, Zaidoun; Arab American University Asia, Mohammad; Arab American University Abu Khader, Imad; Arab American University Herzallah, Khaled; Arab American University Balqis, Nadeen; Arab American University Sallam, Husam; Arab American University |
| <b>Primary Subject Heading</b>: | Epidemiology                                                                                                                                                                                                                                                                                                                                   |
| Secondary Subject Heading:      | Public health                                                                                                                                                                                                                                                                                                                                  |
| Keywords:                       | COVID-19, IMMUNOLOGY, EPIDEMIOLOGY                                                                                                                                                                                                                                                                                                             |
|                                 |                                                                                                                                                                                                                                                                                                                                                |

SCHOLARONE™  
Manuscripts



I, the Submitting Author has the right to grant and does grant on behalf of all authors of the Work (as defined in the below author licence), an exclusive licence and/or a non-exclusive licence for contributions from authors who are: i) UK Crown employees; ii) where BMJ has agreed a CC-BY licence shall apply, and/or iii) in accordance with the terms applicable for US Federal Government officers or employees acting as part of their official duties; on a worldwide, perpetual, irrevocable, royalty-free basis to BMJ Publishing Group Ltd ("BMJ") its licensees and where the relevant Journal is co-owned by BMJ to the co-owners of the Journal, to publish the Work in this journal and any other BMJ products and to exploit all rights, as set out in our [licence](#).

The Submitting Author accepts and understands that any supply made under these terms is made by BMJ to the Submitting Author unless you are acting as an employee on behalf of your employer or a postgraduate student of an affiliated institution which is paying any applicable article publishing charge ("APC") for Open Access articles. Where the Submitting Author wishes to make the Work available on an Open Access basis (and intends to pay the relevant APC), the terms of reuse of such Open Access shall be governed by a Creative Commons licence – details of these licences and which [Creative Commons](#) licence will apply to this Work are set out in our licence referred to above.

Other than as permitted in any relevant BMJ Author's Self Archiving Policies, I confirm this Work has not been accepted for publication elsewhere, is not being considered for publication elsewhere and does not duplicate material already published. I confirm all authors consent to publication of this Work and authorise the granting of this licence.



1  
2  
3  
4  
5  
6  
7  
8  
9  
10  
11  
12  
13  
14  
15  
16  
17  
18  
19  
20  
21  
22  
23  
24  
25  
26  
27  
28  
29  
30  
31  
32  
33  
34  
35  
36  
37  
38  
39  
40  
41  
42  
43  
44  
45  
46  
47  
48  
49  
50  
51  
52  
53  
54  
55  
56  
57  
58  
59  
60

21 Keywords: seroprevalence, Sars-cov-2, Palestine, immunity, covid-19

22

23 Word count: 2853

24

For peer review only

1  
2  
3 25  
4  
56 26 **Abstract**7  
8  
9 27 Objectives

10  
11  
12 28 Seroprevalence rates are important indicators to the epidemiology of COVID-19 and the extent of  
13  
14 29 the pandemic given the existence of asymptomatic cases. The purpose of this study is to assess the  
15  
16 30 seroprevalence rate in the Palestinian population residing in the West Bank.  
17  
18  
19

20 31  
21  
22 32 Setting

23  
24  
25 33 The study involved 1355 participants from 11 governorates, including 112 localities in the West  
26  
27 34 Bank and 1136 individuals visiting Palestinian medical laboratories.  
28  
29

30 35  
31  
32 36 Participants

33  
34  
35 37 Blood samples were collected between 15<sup>th</sup> June 2020 and 30<sup>th</sup> June 2020 from 1355 individuals  
36  
37 38 from randomly selected households in the West Bank in addition to 1136 individuals visiting  
38  
39 39 Palestinian medical laboratories between the 1<sup>st</sup> May 2020 and 9<sup>th</sup> July 2020 for a routine checkup.  
40  
41  
42

43 40  
44  
45 41 Primary and secondary outcome measures

46  
47  
48 42 Out of the 2491 blood samples collected, serological tests for 2455 adequate serum samples were  
49  
50 43 done using an Immunoassay for qualitative detection of antibodies against SARS-CoV-2.  
51  
52 44 seroprevalence was estimated as the proportion of individuals who had a positive result in the total  
53  
54 45 SARS-CoV-2 antibodies in the immunoassay  
55  
56  
57

1  
2  
3 46  
45 47 Results  
6  
7

8 48 The random sample of Palestinians living in the West Bank yielded 0% seroprevalence with 95%  
9  
10 49 and an adjusted confidence interval [0, 0.0043], while the lab referrals sample yielded an estimated  
11  
12  
13 50 seroprevalence of 0.354% with 95% and an adjusted confidence interval [0.001325, 0.011566].  
14

15 51  
1617 52 Conclusions  
18  
19

20 53 Our results indicate that as of mid-june 2020, seroprevalence in Palestine persist low and is  
21  
22 54 inadequate to provide herd immunity, emphasizing the need to maintain health measures to keep  
23  
24  
25 55 the outbreak under control. Population-based seroprevalence studies are to be conducted  
26  
27 56 periodically to monitor the SARS-CoV-2 seroprevalence in Palestine and inform policy makers  
28  
29 57 about the efficacy of their surveillance system.  
30  
31

32 58  
33  
34  
3536 59  
37  
38  
39  
40  
41  
42  
43  
44  
45  
46  
47  
48  
49  
50  
51  
52  
53  
54  
55  
56  
57  
58  
59  
60

## 60 **Strengths and limitations of this study**

### 61 Strengths:

- 62 1- The random selection of household's residents collected between 15<sup>th</sup> June 2020 and 30<sup>th</sup>  
63 June 2020.
- 64 2- Good representation of females and children among the 1136 participants from Medicare  
65 laboratory referrals between 1<sup>st</sup> May 2020 and 9<sup>th</sup> July 2020.

### 66 Limitations:

- 67 1- Low representation in females represented in the random sample.
- 68 2- The random sample did not include children under the age of 15.

## 71 **Introduction**

72 Coronavirus disease 2019, known as COVID-19, is an infectious respiratory disease caused by  
73 novel coronavirus SARS-CoV-2 <sup>1</sup>. Since its emergence in Wuhan, China in December 2019 <sup>2</sup>,  
74 SARS-CoV-2 has spread rapidly around the globe. A global pandemic was declared by the World  
75 Health Organization (WHO) <sup>3,4</sup> and new cases and deaths are being reported daily <sup>5</sup>.

76 Most authorities rely on PCR testing results to estimate number of COVID-19 cases and make up-  
77 to-date decisions <sup>6</sup>. Thus, numbers of patients tested positive for SARS-CoV-2 through PCR  
78 testing, symptomatic patients, those admitted to hospitals, or deceased from COVID-19 are  
79 updated on a daily basis. However, the data may exclude a fraction of the population with previous  
80 mild or asymptomatic COVID-19 that has not been tested by PCR. The proportion of the



1  
2  
3 81 population who have overcome the infection without being noticed can probably be approximated  
4  
5 82 by testing for antibodies against SARS-CoV-2. Antibodies may confer immunity to repeat  
6  
7 83 infection and a high proportion of immune individuals can attenuate the epidemic. Measures of  
8  
9 84 anti-SARS-CoV-2 seroprevalence can also be used to estimate the clinical impact of COVID-19.  
10  
11  
12 85 To this effect, several serological surveys of SARS-CoV-2 have been done worldwide<sup>7-16</sup>.  
13  
14

15 86 Objective:

16  
17  
18 87 There is lack of data on the percentage of undiagnosed Palestinian population with previous mild  
19  
20 88 or asymptomatic COVID-19. Prevalence of COVID-19 infections among Palestinians residing in  
21  
22 89 the West Bank remains unknown and many are concerned about this uncertainty. To this end, we  
23  
24 90 conducted a population cross sectional based seroepidemiological study to assess the spread of  
25  
26 91 SARS-CoV-2 throughout the West Bank. The study included 2491 individuals, designed to be  
27  
28 92 representative by cities (1355 from randomly selected households and 1136 from laboratory  
29  
30 93 referrals). Elecsys® Anti-SARS-CoV-2 testing was done on 2455 adequate serum samples. Here,  
31  
32 94 we describe the study design and the results of the first wave of the study.  
33  
34  
35  
36

## 37 95 **Methods**

### 38 39 40 96 **Study design and participants**

41  
42  
43 97 The study conducted is a cross-sectional serologic testing study aimed to investigate seropositivity  
44  
45 98 for SARS-CoV-2 in the non-institutionalized Palestinian population residing in the West Bank.

46  
47  
48 99 The study involved 1355 participants from 11 governorates, including 112 localities  
49  
50 100 (supplementary table 1). We used 3-stage cluster sampling to select 1395 households. The cluster  
51  
52 101 of households or census track is considered to be a geographic location that is comprised of  
53  
54 102 approximately 100 households. The process for conducting cluster sampling was carried as  
55  
56  
57  
58  
59  
60

1  
2  
3 103 follows: (1) Selecting a cluster of households, (2) Selecting 10 households randomly from each  
4  
5 104 cluster and (3) Selecting a person at random from the selected household. The clusters were  
6  
7  
8 105 selected using probability proportional to size (PPS) sampling (Table 1).  
9  
10

11 106 Table 1: The PPS sampling algorithm  
12

| Location | # of households in the location | Cumulative          |
|----------|---------------------------------|---------------------|
| L1       | X1                              | C1=X1               |
| L2       | X2                              | C2=X1+X2            |
| L3       | X3                              | C3=X1+X2+X3         |
| .        | .                               | .                   |
| .        | .                               | .                   |
| .        | .                               | .                   |
| Lk-1     | Xk-1                            | Ck-1=X1+X2+...+Xk-1 |
| Lk       | Xk                              | Ck = X1+X2+...+Xk   |

13  
14  
15  
16  
17  
18  
19  
20  
21  
22  
23  
24  
25  
26  
27  
28  
29  
30  
31  
32  
33  
34  
35  
36  
37  
38  
39  
40  
41  
42 108 To select the number of clusters within each population location: (1) we calculated the sampling  
43  
44 109 interval which equals the total number of households divided by the total number of clusters need  
45  
46 110 to be selected by the sample say for example (m). So, the sampling interval  $SI = N/m$ , where N is  
47  
48  
49  
50  
51  
52  
53  
54  
55  
56  
57  
58  
59  
60

1  
2  
3 111 the total number of households. (2) selected a random number  $R_0$  between 0 and  $SI$ . (3) calculated  
4  
5 112  $R_i$  as  $R_0 + i * SI$ , a cluster is selected in  $L_i$  if  $R_i$  belongs to the interval  $[C_{i-1}, C_i]$ .

7  
8 113 Field work was carried out between 15<sup>th</sup> June 2020 and 30<sup>th</sup> June 2020 by a team of registered  
9  
10 114 nurses, laboratory technicians, nursing students and laboratory technician students from the Arab  
11  
12 115 American University following standardized health protocols <sup>17</sup>. The random sample did not  
13  
14 116 include children under the age of 15 and suffered from a low representation in females.

15  
16  
17  
18 117 The study also included 1136 participants from Medicare<sup>®</sup> medical laboratories network referrals  
19  
20 118 between 1<sup>st</sup> May 2020 and 9<sup>th</sup> July 2020 in 16 branches in the West Bank (supplementary table 2).

21  
22  
23  
24 119 Participants donated a blood sample for antibodies detection. Blood samples were centrifuged and  
25  
26 120 serum was separated, labelled, stored at -20C at AAUP laboratory until it was used.

### 27 28 29 121 **Detection of antibodies**

30  
31  
32 122 Serological tests for 2455 adequate serum samples were done using an Immunoassay for the  
33  
34 123 qualitative detection of antibodies against SARS-CoV-2 (Elecsys<sup>®</sup> Anti-SARS-CoV-2) in human  
35  
36 124 serum by using the Cobas analyzer cobas e 411 (Roche). The assay uses a recombinant protein  
37  
38 125 representing the nucleocapsid (N) antigen for the determination of antibodies against SARS-CoV-  
39  
40 126 2 with testing time of 18 minutes. The assay was reported to have a specificity of 100%, while the  
41  
42 127 overall sensitivity was 83.87%, rising to 87.0% at 14 days after onset of symptoms, 87.7% 21 days  
43  
44 128 after, and 100% more than 40 days after <sup>18</sup>. We included 6 samples from recovered cases with  
45  
46 129 detected SARS-CoV-2 antibodies as a positive control.

47  
48  
49  
50  
51  
52 130

### 53 54 131 **Statistical Analysis**

55  
56  
57  
58  
59  
60

1  
2  
3 132 We estimated seroprevalence as the proportion of individuals who had a positive result in the total  
4  
5 133 SARS-CoV-2 antibodies in the immunoassay.

6  
7  
8 134 We used Wilson Method With Continuity Correction and Boundary Truncation (WCCBT) to  
9  
10 135 construct 95% CI for the population parameter of seroprevalence <sup>19</sup> .

11  
12  
13 136 We calculated the adjusted confidence of interval. Since the specificity of the kit used for the  
14  
15 137 antibodies test is 100% and 83% respectively <sup>18</sup>, we adjusted the confidence interval for  
16  
17 138 seroprevalence according to the following transformation: Adjusted lower confidence limit=  
18  
19 139  $\max[0, \{a-(1-sp)\}/(sp+se-1)]$  and adjusted upper confidence limit= $\min[1, \{b-(1-sp)\}/(sp+se-1)]$   
20  
21  
22  
23 140 .<sup>20</sup>. The Low representation in females represented in the random sample required reweighting by  
24  
25 141 gender. As for the Medicare Labs sample, the obtained estimates from the lab data are considered  
26  
27 142 to be unbiased and did not require reweighting.

28  
29  
30 143

### 31 32 33 144 **Patients and public involvement**

34  
35  
36 145 The study involved 1355 participants from 11 governorates, including 112 localities and included  
37  
38 146 1136 participants from Medicare<sup>®</sup> laboratories referrals. The development of the research  
39  
40 147 question and outcome measures was based on the public priorities to know the seroprevalence in  
41  
42 148 the Palestinian community. Approval from National ethical committee was obtained  
43  
44 149 (PHRC/HC/737/20). Written informed consent was obtained from the 1355 study participants and  
45  
46 150 approvals were obtained from Medicare<sup>®</sup> laboratories for samples to be tested. Participants \ were  
47  
48 151 notified of the results of the tests.

### 49 50 51 52 53 152 **Results**

1  
2  
3 153 Of the 1395 eligible individuals residing in households selected using 3-stage cluster sampling,  
4  
5 154 1355 participants agreed to participate in the study. The proportion of females was lower  
6  
7  
8 155 compared to males (137, 1218 respectively) including 349 in age group (15-24), 314 in age group  
9  
10 156 (25-34), 377 in age group (35-49) and 315 in age group (50+). (Figure 1). The majority of the  
11  
12 157 participants did not report having symptoms in the last three months nor prevailing chronic  
13  
14 158 diseases (supplementary table 3 and 4). None of the tested specimens revealed presence of  
15  
16 159 antibodies against SARS-CoV-2. A 95% CI for the population parameter of seroprevalence was  
17  
18 [0.0, 0.0036]. A 95% CI for the population parameter of seroprevalence was [0.0, 0.0036], and an  
19 160  
20 adjusted confidence interval of [0, 0.0043].  
21 161

22  
23  
24 162 Of the 1136 participants from Medicare laboratory referrals in 16 branches. The proportion of  
25  
26 163 males was lower than females (395, 741 respectively) including 71 in age group lower less than  
27  
28 164 15, 173 in age group (15-24), 297 tests in age group (25-34), 290 in age group (35-49) and 305 in  
29  
30 165 age group (50+) (Figure 2). Records of symptoms and chronic diseases were unattainable. Out of  
31  
32 166 the 1136 tested participants, 3 males, ages 38, 58, 59 and 1 female, age 40 revealed antibodies  
33  
34 167 against SARS-CoV-2, with 95% CI [0.0011,0.0096] and an adjusted confidence interval of  
35  
36 [0.001325, 0.011566].  
37 168  
38  
39  
40  
41

42 169 All serum samples were adequate for testing. Out of the 1136 tested participants, 4 revealed  
43  
44 170 antibodies against Sars-CoV-2 with 95% CI [0.0011,0096].  
45  
46

47 171

## 48 49 50 172 **Discussion**

51  
52  
53 173 To our knowledge, this is the first SARS-CoV-2 seroprevalence study in the Palestine. The  
54  
55 174 findings from this seroprevalence study for SARS-CoV-2 indicate that the estimated  
56  
57

1  
2  
3 175 seroprevalence of the total SARS-CoV-2 antibodies persist low as of mid of June. The random  
4  
5 176 sample of Palestinians living in the West Bank yielded 0% seroprevalence with 95% and an  
6  
7 177 adjusted confidence interval of [0, 0.0043], while the lab referrals sample yielded an estimated  
8  
9 178 seroprevalence of 0.354% with 95% and an adjusted confidence [0.001325, 0.011566].  
10  
11  
12

13 179 The low SARS-CoV-2 antibody prevalence in our population can be explained by the imposed total  
14  
15 180 lockdown in the first three months when cases were under control and only reached around 800 cases by  
16  
17 181 May. Our sampling dates ranged from 15<sup>th</sup> June 2020-30<sup>th</sup> June 2020 in the random sample and  
18  
19 182 between 1<sup>st</sup> May 2020 and 9<sup>th</sup> July 2020 in the lab referrals sample. The GoP extended the state of  
20  
21 183 emergency and imposed total lockdown in the first three months. The samples were collected after  
22  
23 184 this strict lockdown which was accompanied by a drop in disease prevalence. Covid-19 cases were  
24  
25 185 under control. The reported cases by the Palestinian ministry of health at the beginning of the data  
26  
27 186 collection process by mid-June was 689 cases, and the reported cases rose to 2765 cases by the  
28  
29 187 end of June <sup>21</sup>. However, it takes 10-14 days for antibodies against SARS-CoV-2 to go up,  
30  
31 188 therefore, our results indeed reflect the situation by mid of June. Also, It was previously reported  
32  
33 189 that antibodies against SARS-CoV-2 may drop or even disappear in patients with mild Covid-19  
34  
35 190 <sup>22-24</sup> which may have led to the inability to detect antibodies in a few previously positive cases.  
36  
37  
38  
39  
40

41 191 Seroprevalence in Palestine is very close to that identified in Jordan (0% prevalence) <sup>15</sup>, a  
42  
43 192 neighboring country, which was explained to be due to the strict closures implemented by the  
44  
45 193 Jordanian government and the eventual curtailing of infections in Jordan. Also, Seroprevalence in  
46  
47 194 Maine and Montana was 0.4% and 0.5% respectively by end of August 2020 <sup>25</sup>. In comparison to  
48  
49 195 other countries like Spain, Italy, Japan India, Los Angeles, Germany, Switzerland the  
50  
51 196 seroprevalence in Palestine is low <sup>7-16</sup>. Similarly, the seroprevalence among Palestinians residing  
52  
53 197 in the West Bank was shown to be lower than that in Israel as reported in the first conducted  
54  
55  
56  
57  
58  
59  
60

1  
2  
3 198 serological study of 1,700 tests. The study suggested that 2.5 percent of the Israeli population, have  
4  
5 199 had the coronavirus<sup>26</sup>. It is, however, noteworthy that a comparison with other countries may be  
6  
7  
8 200 problematic due to the timing and the stage of the pandemic which may vary affecting the  
9  
10 201 seroprevalence estimates.

11  
12  
13 202 A key strength of our study is the random selection of household's residents collected between  
14  
15 203 15<sup>th</sup> June 2020 and 30<sup>th</sup> June 2020. The clusters were selected using probability proportional to  
16  
17  
18 204 size (PPS) sampling. This technique ensures getting self-weighting sample which can be used to  
19  
20 205 produce unbiased estimators for the parameters of interest. The sample was supposed to be  
21  
22 206 stratified by gender and age. However, the female response was low and samples from females  
23  
24 207 were more difficult to obtain due to a cultural boundary. In fact, women were less open to  
25  
26 208 welcoming a team of nurses at home for research purposes. Also, the random sample did not  
27  
28 209 include children under the age of 15 to avoid anxiety due to fear of needles in the study to eliminate  
29  
30 210 personal fears due to blood withdrawal. To ensure that the estimated prevalence in the random  
31  
32 211 sample was unbiased, we reweighted the sample by gender. Except for cultural issues resulting in  
33  
34 212 the low response rate from women in the random sample, we do not believe there were any issues  
35  
36 213 that would lead participants to opt out from the study.

37  
38  
39 214 As for the lab referrals sample, it represents the population of the lab referrals between the 1st May  
40  
41 215 2020 and 9th July 2020. The seroprevalence in this sample was 4 positive cases out of the 1136  
42  
43 216 samples tested. Since the seroprevalence within the lab referral population is close to zero, we  
44  
45 217 used Wilson Method with Continuity Correction and Truncation (WCCBT) to construct a 95%  
46  
47 218 confidence interval for the population parameter of seroprevalence [0.0011,0096]. In comparison  
48  
49 219 to household samples that were collected between 15th-30th of June, laboratory referral samples  
50  
51 220 include a good representation of females and children below the age of 15 (Figure 2). Also, samples

1  
2  
3 221 were collected starting from May 1st, which may better represent the small peaks of SARS-CoV-  
4  
5 222 2 reported cases in Palestine and thus explain the presence of few positive samples in comparison  
6  
7  
8 223 to null in household samples. The sample was randomly selected by the lab data managers.  
9  
10 224 Although females were not represented among the 1355 adults from Palestinian households in the,  
11  
12 225 they were represented among the 1136 individuals visiting laboratories; out of the 1136, 741, more  
13  
14  
15 226 than 50% of the participants were females (Figure 2). Hence, the obtained estimates from the lab  
16  
17 227 data are considered to be unbiased.

18  
19  
20 228 Our study only detected SARS-CoV-2 antibodies. It was previously reported that antibodies  
21  
22 229 against SARS-CoV-2 may drop or even disappear in patients with mild Covid-19, which may have  
23  
24  
25 230 led to the inability to detect antibodies in a few previously positive cases<sup>23,22</sup>. Also, it is important  
26  
27 231 to recognize that cellular immunity may play a role in providing immunity against SARS-CoV-2  
28  
29 232 reinfection<sup>18</sup>. Further studies aimed at testing cellular immunity are important. It is also noteworthy  
30  
31  
32 233 that previous studies have indicated that asymptomatic individuals were reported to have a weaker  
33  
34 234 immune response to SARS-CoV-2 infection and a higher percentage of asymptomatic individuals  
35  
36 235 became seronegative when compared to symptomatic individuals in the early recovering phases.  
37  
38 236 The reduction in neutralizing antibody levels may have implications for immunity strategy and  
39  
40  
41 237 serological surveys<sup>24,27</sup>.

42  
43  
44 238 In conclusion, our study provides estimates of SARS-CoV-2 seroprevalence in Palestine. Our  
45  
46 239 results reflect the seroprevalence as of mid of June. It is noteworthy that on May 25<sup>th</sup>, the  
47  
48  
49 240 government of Palestine eased the restrictions following a decline in cases which led to a surge in  
50  
51 241 cases beginning of July, with the epicenter of the epidemic in Hebron accounting for over 70 % of  
52  
53 242 active cases implying a possible increase in seroprevalence after July. Reported cases rose to 2765  
54  
55  
56 243 cases by the end of June. By December 2020, the cumulative number of positive cases grew to



1  
2  
3 244 150,046 cases <sup>21</sup> . In this situation, health measures have to be taken to keep the outbreak under  
4  
5 245 control. In order to monitor the SARS-CoV-2 seroprevalence in Palestine and inform policy  
6  
7 246 makers about the efficacy of their surveillance system. With the surge in cases, conducting  
8  
9 247 population-based seroprevalence studies on a regular basis is important.  
10  
11  
12  
13  
14 248

### 16 249 **Acknowledgment**

17  
18  
19 250 We thank the participants for their cooperation.  
20  
21

22 251 We thank the registered nurses, laboratory technicians, nursing students and laboratory technician  
23  
24 252 students from the Arab American University: Ahmad Hodrub, Mohammad Faisal, Wajdi Tu`ma,  
25  
26 253 Adam Maraw`a, Sharhabeel Nasrallah, Hisham Zahran and Mohammad Barakat  
27  
28  
29

30 254 We thank Medicare labs for providing blood samples of individuals visiting their laboratories.  
31  
32

33 255  
34  
35

### 36 256 **Conflict of Interest Disclosures**

37  
38  
39 257 No authors reported disclosures.  
40  
41

42 258  
43  
44

### 45 259 **Funding/Support**

46  
47  
48 260 Award/Grant number is not applicable  
49  
50

51 261  
52  
53

### 54 262 **Authors contribution**

55  
56  
57  
58  
59  
60

1  
2  
3 263 Research design: Nouar Qutob, Zaidoun Salah, Faisal Awartani  
4  
5

6 264 Field work coordination: Mohammad Asia, Imad Abu Khader  
7  
8

9 265 Data analysis: Faisal Awartani  
10  
11

12 266 Manuscript writing: Nouar Qutob  
13  
14

15 267 Manuscript revisions: Nouar Qutob, Faisal Awartani, Zaidoun Salah  
16  
17

18 268 Methodology and lab work: Nouar Qutob, Khaled Herzallah, Nadeen Balqis, Husam Sallam  
19  
20

21 269  
22  
23

## 24 270 **Data sharing**

25  
26

27 271 Data are available upon reasonable request  
28  
29

30 272  
31  
32

## 33 273 **Figure Legends**

34  
35

36 274 Figure 1: (a) Age and (b) gender distribution of the 1355 participants from Palestinian households  
37  
38 275 in the West Bank. Blood samples were collected between 15<sup>th</sup> June 2020 and 30<sup>th</sup> June from the  
39  
40 276 participants.  
41  
42

43 277 Figure 2: (a) Age and (b) Gender distribution of the 1136 participants visiting Medicare  
44  
45 278 laboratories between the 1<sup>st</sup> May 2020 and 9<sup>th</sup> July 2020 for a routine checkup.  
46  
47  
48

49 279  
50  
51

## 52 280 **References**

53  
54

55 281 1. Mayo clinic. oronavirus disease 2019 (COVID-19).  
56  
57  
58

- 1  
2  
3 282 2. Lu H, Stratton CW, Tang YW. Outbreak of pneumonia of unknown etiology in Wuhan,  
4  
5 283 China: The mystery and the miracle. *J Med Virol.* 2020;92(4):401-402.  
6  
7  
8 284 doi:10.1002/jmv.25678  
9  
10  
11 285 3. World Health Organization. *Novel Coronavirus(2019-NCoV), Situation Report - 12.*;  
12  
13 286 2020.  
14  
15  
16 287 4. Hui DS, I Azhar E, Madani TA, Ntoumi F, Kock R, Dar O et al. The continuing 2019-  
17  
18 288 nCoV epidemic threat of novel coronaviruses to global health — The latest 2019 novel  
19  
20 289 coronavirus outbreak in Wuhan, China The. 2020;(January).  
21  
22  
23 290 5. COVID-19 Dashboard by the Center for Systems Science and Engineering (CSSE) at  
24  
25 291 Johns Hopkins University (JHU).  
26  
27  
28  
29 292 6. Onder G, Rezza G, Brusaferro S. Case-Fatality Rate and Characteristics of Patients Dying  
30  
31 293 in Relation to COVID-19 in Italy. *JAMA - J Am Med Assoc.* 2020;2019:2019-2020.  
32  
33 294 doi:10.1001/jama.2020.4683  
34  
35  
36 295 7. Snoeck CJ, Vaillant M, Abdelrahman T, et al. Prevalence of SARS-CoV-2 infection in the  
37  
38 296 Luxembourgish population the CON-VINCE study. *Medrxiv.* 2020:2020.05.11.20092916.  
39  
40 297 doi:10.1101/2020.05.11.20092916  
41  
42  
43  
44 298 8. Wu X, Fu B, Chen L, Feng Y. Serological tests facilitate identification of asymptomatic  
45  
46 299 SARS-CoV-2 infection in Wuhan, China. *J Med Virol.* 2020:2-3. doi:10.1002/jmv.25904  
47  
48  
49 300 9. Bryan A, Pepper G, Wener MH, et al. Performance Characteristics of the Abbott Architect  
50  
51 301 SARS-CoV-2 IgG Assay and Seroprevalence in Boise, Idaho. *J Clin Microbiol.*  
52  
53 302 2020;(May). doi:10.1128/JCM.00941-20  
54  
55  
56  
57  
58  
59  
60

- 1  
2  
3 303 10. Stringhini S, Wisniak A, Piumatti G, et al. Repeated seroprevalence of anti-SARS-CoV-2  
4  
5 304 IgG antibodies in a population-based sample from Geneva, Switzerland. *medRxiv*.  
6  
7 305 2020:2020.05.02.20088898. doi:10.1101/2020.05.02.20088898  
8  
9  
10  
11 306 11. Valenti L, Bergna A, Pelusi S, et al. SARS-CoV-2 seroprevalence trends in healthy blood  
12  
13 307 donors during the COVID-19 Milan outbreak. *medRxiv*. 2020:2020.05.11.20098442.  
14  
15 308 doi:10.1101/2020.05.11.20098442  
16  
17  
18 309 12. Shakiba M, Hashemi Nazari SS, Mehrabian F, Rezvani SM, Ghasempour Z, Heidarzadeh  
19  
20 310 A. Seroprevalence of COVID-19 virus infection in Guilan province, Iran. *medRxiv*.  
21  
22 311 2020:2020.04.26.20079244. doi:10.1101/2020.04.26.20079244  
23  
24  
25  
26 312 13. Pollán M, Pérez-Gómez B, Pastor-Barriuso R, et al. Prevalence of SARS-CoV-2 in Spain  
27  
28 313 (ENE-COVID): a nationwide, population-based seroepidemiological study. *Lancet*  
29  
30 314 (*London, England*). 2020;6736(20):1-11. doi:10.1016/S0140-6736(20)31483-5  
31  
32  
33  
34 315 14. Stadlbauer D, Amanat F, Chromikova V, et al. SARS-CoV-2 Seroconversion in Humans:  
35  
36 316 A Detailed Protocol for a Serological Assay, Antigen Production, and Test Setup. *Curr*  
37  
38 317 *Protoc Microbiol*. 2020;57(1):2425-2427. doi:10.1002/cpmc.100  
39  
40  
41 318 15. Sughayer MA, Mansour A, Nuirat A Al, Souan L, Ghanem M, Siag M. Covid-19  
42  
43 319 Seroprevalence rate in healthy blood donors from a community under strict lockdown  
44  
45 320 measures. *medRxiv*. 2020:2020.06.06.20123919. doi:10.1101/2020.06.06.20123919  
46  
47  
48  
49 321 16. Hains DS, Schwaderer AL, Carroll AE, Starr MC, Wilson AC. Seroprevalence of SARS-  
50  
51 322 CoV-2 – Specific Antibodies Among Adults in Los Angeles County , California , on April  
52  
53 323 10-11 , 2020. 2020;323(23):2425-2427. doi:10.1002/cpmc.100  
54  
55  
56  
57  
58  
59  
60

- 1  
2  
3 324 17. World Health Organization. Ethical standards for research during public health  
4  
5 325 emergencies: distilling existing guidance to support COVID-19. *Ethical Stand Res Dur*  
6  
7 326 *public Heal emergencies Distill Exist Guid to Support COVID-19 R&D*. 2020:1-4.  
8  
9  
10 327 18. Mahase E. Covid-19: Two antibody tests are “highly specific” but vary in sensitivity,  
11  
12 evaluations find. *BMJ*. 2020;369(May):m2066. doi:10.1136/bmj.m2066  
13  
14  
15 329 19. Sakthivel Sivam SM. Everything or Nothing - A Better Confidence Intervals for Binomial  
16  
17 Proportion in Clinical Trial Data Analysis . Sakthivel Sivam , Quartesian LLC , Princeton  
18  
19 , New Jersey Subbiah Meenakshisundaram , L . N Government College , Ponneri , India.  
20  
21 331 2016;(2014).  
22  
23 332  
24  
25 333 20. Diggle PJ. Estimating Prevalence Using an Imperfect Test. *Epidemiol Res Int*.  
26  
27 334 2011;2011:1-5. doi:10.1155/2011/608719  
28  
29  
30 335 21. <https://corona.ps/>.  
31  
32  
33 336 22. Bölke E, Matuschek C, Fischer JC. Loss of Anti-SARS-CoV-2 Antibodies in Mild Covid-  
34  
35 337 19. *N Engl J Med*. 2020;383(17):1694-1698. doi:10.1056/nejmc2028468  
36  
37  
38 338 23. Ibarondo FJ, Fulcher JA, Goodman-Meza D, et al. Rapid Decay of Anti-SARS-CoV-2  
39  
40 339 Antibodies in Persons with Mild Covid-19. *N Engl J Med*. 2020:1-2.  
41  
42 340 doi:10.1056/nejmc2025179  
43  
44  
45 341 24. Zhao J, Yuan Q, Wang H, et al. Antibody responses to SARS-CoV-2 in patients of novel  
46  
47 342 coronavirus disease 2019. *Clin Infect Dis*. 2020;(M):2-3. doi:10.1093/cid/ciaa344  
48  
49  
50 343 25. COVID-19 Case Surveillance Public Use Data. [https://covid.cdc.gov/covid-data-](https://covid.cdc.gov/covid-data-tracker/#national-lab)  
51  
52 344 [tracker/#national-lab](https://covid.cdc.gov/covid-data-tracker/#national-lab).  
53  
54  
55  
56  
57  
58  
59  
60

- 1  
2  
3 345 26. [https://www.jpost.com/israel-news/coronavirus-herd-immunity-not-in-israel-according-to-](https://www.jpost.com/israel-news/coronavirus-herd-immunity-not-in-israel-according-to-a-serological-study-630059)  
4  
5 346 [a-serological-study-630059.](https://www.jpost.com/israel-news/coronavirus-herd-immunity-not-in-israel-according-to-a-serological-study-630059)  
6  
7  
8 347 27. Wu LP, Wang NC, Chang YH, et al. Duration of antibody responses after severe acute  
9  
10 348 respiratory syndrome. *Emerg Infect Dis.* 2007;13(10):1562-1564.  
11  
12  
13 349 doi:10.3201/eid1310.070576  
14  
15  
16 350  
17  
18  
19 351  
20  
21  
22 352  
23  
24  
25  
26  
27  
28  
29  
30  
31  
32  
33  
34  
35  
36  
37  
38  
39  
40  
41  
42  
43  
44  
45  
46  
47  
48  
49  
50  
51  
52  
53  
54  
55  
56  
57  
58  
59  
60

1  
2  
3  
4  
5  
6  
7  
8  
9  
10  
11  
12  
13  
14  
15  
16  
17  
18  
19  
20  
21  
22  
23  
24  
25  
26  
27  
28  
29  
30  
31  
32  
33  
34  
35  
36  
37  
38  
39  
40  
41  
42  
43  
44  
45  
46  
47  
48  
49  
50  
51  
52  
53  
54  
55  
56  
57  
58  
59  
60

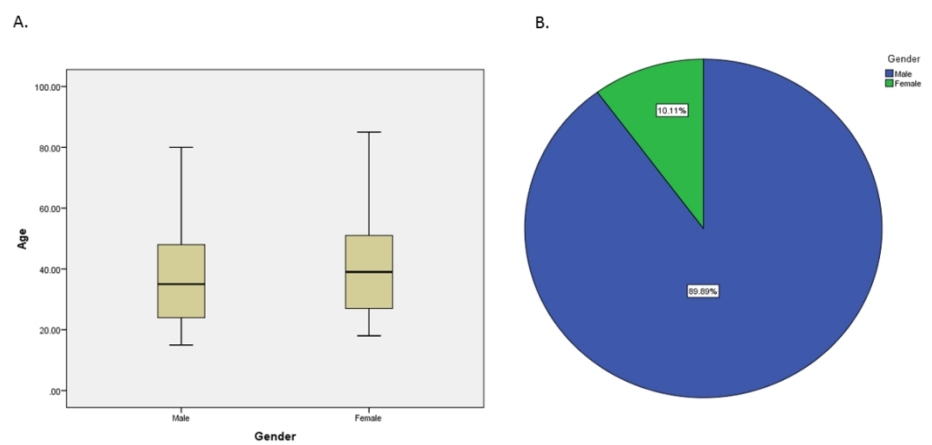

Figure 1: (a) Age and (b) gender distribution of the 1355 participants from Palestinian households in the West Bank. Blood samples were collected between 15th June 2020 and 30th June from the participants.

338x190mm (96 x 96 DPI)

1  
2  
3  
4  
5  
6  
7  
8  
9  
10  
11  
12  
13  
14  
15  
16  
17  
18  
19  
20  
21  
22  
23  
24  
25  
26  
27  
28  
29  
30  
31  
32  
33  
34  
35  
36  
37  
38  
39  
40  
41  
42  
43  
44  
45  
46  
47  
48  
49  
50  
51  
52  
53  
54  
55  
56  
57  
58  
59  
60

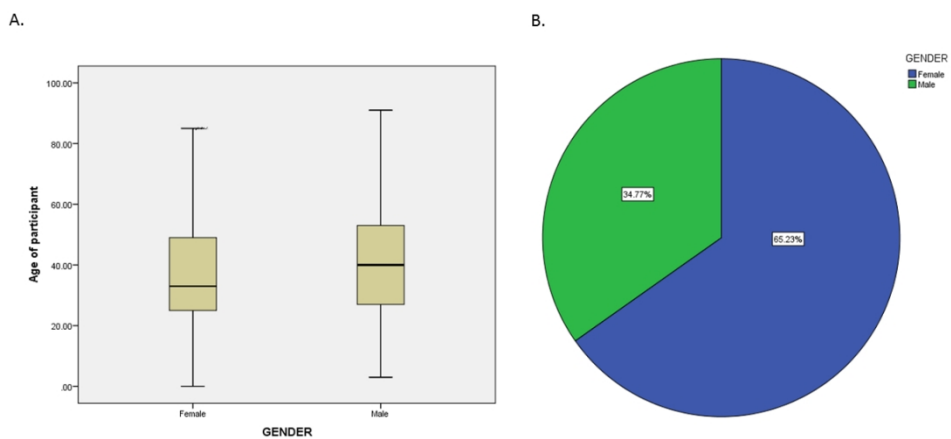

Figure 2: (a) Age and (b) Gender distribution of the 1136 participants visiting Medicare laboratories between the 1st May 2020 and 9th July 2020 for a routine checkup.

338x190mm (96 x 96 DPI)



Supplementary Table 1: Governorates and localities included in the households sample

| <b>Governorate</b> | <b>Locality</b>        |
|--------------------|------------------------|
| Jenin              | Sir                    |
| Jenin              | Anza                   |
| Jenin              | Al Araqa               |
| Jenin              | Al Mughayyir           |
| Jenin              | Al Fandaqumiya         |
| Jenin              | Al Judeida             |
| Jenin              | Ajja                   |
| Jenin              | Birqin                 |
| Jenin              | Meithalun              |
| Jenin              | Jaba                   |
| Jenin              | Silat al Harithiya     |
| Jenin              | Arraba                 |
| Jenin              | Yabad                  |
| Jenin              | Al Yamun               |
| Jenin              | Qabatiya               |
| Jenin              | Jenin                  |
| Tubas              | Ras al Faraa           |
| Tubas              | Aqqaba                 |
| Tubas              | Tammun                 |
| Tubas              | Tubas                  |
| Tulkarm            | Kafa                   |
| Tulkarm            | Kafr Jammal            |
| Tulkarm            | Kafr al Labad          |
| Tulkarm            | Nur Shams Camp         |
| Tulkarm            | Bala                   |
| Tulkarm            | Tulkarm Camp           |
| Tulkarm            | Attil                  |
| Tulkarm            | Tulkarm                |
| Nablus             | Iraq Burin             |
| Nablus             | Qusin                  |
| Nablus             | As Sawiya              |
| Nablus             | Majdal Bani Fadil      |
| Nablus             | Sabastiya              |
| Nablus             | Ein Beit el Ma Camp    |
| Nablus             | Beit Dajan             |
| Nablus             | Qusra                  |
| Nablus             | Askar Camp )al Qadeem( |
| Nablus             | Awarta                 |
| Nablus             | Asira ash Shamaliya    |
| Nablus             | Aqraba                 |

|                     |                    |
|---------------------|--------------------|
| Nablus              | Beit Furik         |
| Nablus              | Balata Camp        |
| Nablus              | Nablus             |
| Qalqiliya           | Kafr Laqif         |
| Qalqiliya           | Jinsafut           |
| Qalqiliya           | Sanniriya          |
| Qalqiliya           | Azzun              |
| Qalqiliya           | Qalqiliya          |
| Salfit              | Deir Istiya        |
| Salfit              | Haris              |
| Salfit              | Biddya             |
| Salfit              | Salfit             |
| Ramallah & Al-Bireh | Shabtin            |
| Ramallah & Al-Bireh | Ein Arik           |
| Ramallah & Al-Bireh | Beitin             |
| Ramallah & Al-Bireh | Ein Yabrud         |
| Ramallah & Al-Bireh | Arura              |
| Ramallah & Al-Bireh | Beitillu           |
| Ramallah & Al-Bireh | Deir Abu Mashaal   |
| Ramallah & Al-Bireh | Khirbet Abu Falah  |
| Ramallah & Al-Bireh | Beit Ur at Tahta   |
| Ramallah & Al-Bireh | Shuqba             |
| Ramallah & Al-Bireh | Qibya              |
| Ramallah & Al-Bireh | Al Jalazun Camp    |
| Ramallah & Al-Bireh | Beituniya          |
| Ramallah & Al-Bireh | Ramallah           |
| Ramallah & Al-Bireh | Al Bireh           |
| Jericho & Al-Aghwar | Ein as Sultan Camp |
| Jericho & Al-Aghwar | Jericho )Ariha(    |
| Jerusalem           | Ash Sheikh Sad     |

|           |                            |
|-----------|----------------------------|
| Jerusalem | Beit Surik                 |
| Jerusalem | As Sawahira ash Sharqiya   |
| Jerusalem | Hizma                      |
| Jerusalem | Qalandiya Camp             |
| Jerusalem | Ar Ram & Dahiyat al Bareed |
| Jerusalem | Anata                      |
| Jerusalem | Al Eizariya                |
| Bethlehem | Al Masara                  |
| Bethlehem | Wadi Rahhal                |
| Bethlehem | Dar Salah                  |
| Bethlehem | Husan                      |
| Bethlehem | Hindaza and Bureidaa       |
| Bethlehem | Nahhalin                   |
| Bethlehem | Ad Duheisha Camp           |
| Bethlehem | Ad Doha                    |
| Bethlehem | Beit Sahur                 |
| Bethlehem | Beit Jala                  |
| Bethlehem | Beit Fajjar                |
| Bethlehem | Bethlehem (Beit Lahm)      |
| Hebron    | An Najada                  |
| Hebron    | Beit ar Rush al Fauqa      |
| Hebron    | Shuyukh al Arrub           |
| Hebron    | Al Burj and Al Bira        |
| Hebron    | Nuba                       |
| Hebron    | Al Fawwar Camp             |
| Hebron    | Beit Kahil                 |
| Hebron    | Kharas                     |
| Hebron    | Beit Awwa                  |
| Hebron    | Beit Ula                   |
| Hebron    | Taffuh                     |
| Hebron    | Beit Ummar                 |
| Hebron    | Surif                      |
| Hebron    | Tarqumiya                  |
| Hebron    | Sair                       |
| Hebron    | Bani Naim                  |
| Hebron    | Idhna                      |
| Hebron    | As Samu                    |
| Hebron    | Halhul                     |
| Hebron    | Adahiriya                  |
| Hebron    | Dura                       |
| Hebron    | Yatta                      |

|        |                    |
|--------|--------------------|
| Hebron | Hebron (Al Khalil) |
|--------|--------------------|

For peer review only

Supplementary Table 2: Governorates and localities included in the lab referrals sample

| <b>Governorate</b> | <b>Locality</b>    |
|--------------------|--------------------|
| Jericho            | Jericho            |
| Hebron             | Dura               |
| Hebron             | Yatta              |
| Hebron             | Hebron (Al Khalil) |
| Hebron             | Adahiriya          |
| Bethany            | Bethany            |
| Bethlehem          | Bethlehem          |
| Jenin              | Jenin              |
| Ramallah           | Ramallah           |
| Ramallah           | Silwad             |
| Tubas              | Tubas              |
| Tulkarem           | Tulkarem           |
| Qalqiliah          | Qalqiliah          |
| Nablus             | Nablus             |
| Salfit             | Bidia              |
| Salfit             | Salfit             |

Supplementary Table 3: Prevalence of symptoms reported by participants

| Symptom   | Yes<br>N=1355 | No<br>N=1355 | Don't Know<br>N=1355 |
|-----------|---------------|--------------|----------------------|
| Fever     | 3.8%          | 95.4%        | .8%                  |
| Sneezing  | 6.8%          | 92.4%        | .8%                  |
| Dry Cough | 5.7%          | 93.5%        | .8%                  |
| Vomiting  | 1.1%          | 98.1%        | .8%                  |

|                                                  |      |       |     |
|--------------------------------------------------|------|-------|-----|
| Sore and red throat                              | 4.3% | 94.9% | .8% |
| Diarrhea                                         | 2.0% | 97.2% | .8% |
| Muscle ache                                      | 3.2% | 95.9% | .9% |
| Nasal Congestion                                 | 2.8% | 96.3% | .8% |
| Skin rash or change in color of the thumb or toe | 1.2% | 97.9% | .9% |
| Loss of sense of taste and smell                 | .7%  | 98.5% | .8% |
| Chest pain                                       | 1.7% | 97.6% | .8% |
| Difficulty breathing                             | 1.8% | 97.4% | .8% |
| Loss of ability to speak or move                 | .6%  | 98.7% | .8% |

Supplementary Table 4: Prevalence of chronic diseases reported by participants

| Chronic Disease | Yes<br>N=1355 | No<br>N=1355 | Don't Know<br>N=1355 |
|-----------------|---------------|--------------|----------------------|
| Heart disease   | 5.1%          | 94.9%        | 0.0%                 |

|                                        |       |       |      |
|----------------------------------------|-------|-------|------|
| Blood pressure                         | 11.9% | 88.1% | 0.0% |
| Cancer                                 | .2%   | 99.8% | .0%  |
| Kidney disease                         | .7%   | 99.2% | .1%  |
| Nervous system disease                 | .7%   | 99.3% | 0.0% |
| Diabetes                               | 10.1% | 89.9% | 0.0% |
| Respiratory disease (Asthma)           | 4.4%  | 95.5% | .0%  |
| Hospitalized through the past 6 months | 4.2%  | 95.8% | .0%  |
| On immunosuppressant drug?             | 1.2%  | 98.8% | 0.0% |

## STROBE Statement—checklist of items that should be included in reports of observational studies

|                              | Item No | Recommendation                                                                                                                                                                                                                                                                                                                                                                                                                                                                                                                                                                                                                                                                                   |
|------------------------------|---------|--------------------------------------------------------------------------------------------------------------------------------------------------------------------------------------------------------------------------------------------------------------------------------------------------------------------------------------------------------------------------------------------------------------------------------------------------------------------------------------------------------------------------------------------------------------------------------------------------------------------------------------------------------------------------------------------------|
| <b>Title and abstract</b>    | 1       | (a) Indicate the study's design with a commonly used term in the title or the abstract<br>(b) Provide in the abstract an informative and balanced summary of what was done and what was found                                                                                                                                                                                                                                                                                                                                                                                                                                                                                                    |
| <b>Introduction</b>          |         |                                                                                                                                                                                                                                                                                                                                                                                                                                                                                                                                                                                                                                                                                                  |
| Background/rationale         | 2       | Explain the scientific background and rationale for the investigation being reported                                                                                                                                                                                                                                                                                                                                                                                                                                                                                                                                                                                                             |
| Objectives                   | 3       | State specific objectives, including any prespecified hypotheses                                                                                                                                                                                                                                                                                                                                                                                                                                                                                                                                                                                                                                 |
| <b>Methods</b>               |         |                                                                                                                                                                                                                                                                                                                                                                                                                                                                                                                                                                                                                                                                                                  |
| Study design                 | 4       | Present key elements of study design early in the paper                                                                                                                                                                                                                                                                                                                                                                                                                                                                                                                                                                                                                                          |
| Setting                      | 5       | Describe the setting, locations, and relevant dates, including periods of recruitment, exposure, follow-up, and data collection                                                                                                                                                                                                                                                                                                                                                                                                                                                                                                                                                                  |
| Participants                 | 6       | (a) <i>Cohort study</i> —Give the eligibility criteria, and the sources and methods of selection of participants. Describe methods of follow-up<br><i>Case-control study</i> —Give the eligibility criteria, and the sources and methods of case ascertainment and control selection. Give the rationale for the choice of cases and controls<br><i>Cross-sectional study</i> —Give the eligibility criteria, and the sources and methods of selection of participants<br>(b) <i>Cohort study</i> —For matched studies, give matching criteria and number of exposed and unexposed<br><i>Case-control study</i> —For matched studies, give matching criteria and the number of controls per case |
| Variables                    | 7       | Clearly define all outcomes, exposures, predictors, potential confounders, and effect modifiers. Give diagnostic criteria, if applicable                                                                                                                                                                                                                                                                                                                                                                                                                                                                                                                                                         |
| Data sources/<br>measurement | 8*      | For each variable of interest, give sources of data and details of methods of assessment (measurement). Describe comparability of assessment methods if there is more than one group                                                                                                                                                                                                                                                                                                                                                                                                                                                                                                             |
| Bias                         | 9       | Describe any efforts to address potential sources of bias                                                                                                                                                                                                                                                                                                                                                                                                                                                                                                                                                                                                                                        |
| Study size                   | 10      | Explain how the study size was arrived at                                                                                                                                                                                                                                                                                                                                                                                                                                                                                                                                                                                                                                                        |
| Quantitative variables       | 11      | Explain how quantitative variables were handled in the analyses. If applicable, describe which groupings were chosen and why                                                                                                                                                                                                                                                                                                                                                                                                                                                                                                                                                                     |
| Statistical methods          | 12      | (a) Describe all statistical methods, including those used to control for confounding<br>(b) Describe any methods used to examine subgroups and interactions<br>(c) Explain how missing data were addressed<br>(d) <i>Cohort study</i> —If applicable, explain how loss to follow-up was addressed<br><i>Case-control study</i> —If applicable, explain how matching of cases and controls was addressed<br><i>Cross-sectional study</i> —If applicable, describe analytical methods taking account of sampling strategy<br>(e) Describe any sensitivity analyses                                                                                                                                |

Continued on next page



1  
2  
3  
4  
5  
6  
7  
8  
9  
10  
11  
12  
13  
14  
15  
16  
17  
18  
19  
20  
21  
22  
23  
24  
25  
26  
27  
28  
29  
30  
31  
32  
33  
34  
35  
36  
37  
38  
39  
40  
41  
42  
43  
44  
45  
46  
47  
48  
49  
50  
51  
52  
53  
54  
55  
56  
57  
58  
59  
60**Results**

|                  |     |                                                                                                                                                                                                                                                                                                                                                                                                               |
|------------------|-----|---------------------------------------------------------------------------------------------------------------------------------------------------------------------------------------------------------------------------------------------------------------------------------------------------------------------------------------------------------------------------------------------------------------|
| Participants     | 13* | (a) Report numbers of individuals at each stage of study—eg numbers potentially eligible, examined for eligibility, confirmed eligible, included in the study, completing follow-up, and analysed<br>(b) Give reasons for non-participation at each stage<br>(c) Consider use of a flow diagram                                                                                                               |
| Descriptive data | 14* | (a) Give characteristics of study participants (eg demographic, clinical, social) and information on exposures and potential confounders<br>(b) Indicate number of participants with missing data for each variable of interest<br>(c) <i>Cohort study</i> —Summarise follow-up time (eg, average and total amount)                                                                                           |
| Outcome data     | 15* | <i>Cohort study</i> —Report numbers of outcome events or summary measures over time<br><i>Case-control study</i> —Report numbers in each exposure category, or summary measures of exposure<br><i>Cross-sectional study</i> —Report numbers of outcome events or summary measures                                                                                                                             |
| Main results     | 16  | (a) Give unadjusted estimates and, if applicable, confounder-adjusted estimates and their precision (eg, 95% confidence interval). Make clear which confounders were adjusted for and why they were included<br>(b) Report category boundaries when continuous variables were categorized<br>(c) If relevant, consider translating estimates of relative risk into absolute risk for a meaningful time period |
| Other analyses   | 17  | Report other analyses done—eg analyses of subgroups and interactions, and sensitivity analyses                                                                                                                                                                                                                                                                                                                |

**Discussion**

|                  |    |                                                                                                                                                                            |
|------------------|----|----------------------------------------------------------------------------------------------------------------------------------------------------------------------------|
| Key results      | 18 | Summarise key results with reference to study objectives                                                                                                                   |
| Limitations      | 19 | Discuss limitations of the study, taking into account sources of potential bias or imprecision. Discuss both direction and magnitude of any potential bias                 |
| Interpretation   | 20 | Give a cautious overall interpretation of results considering objectives, limitations, multiplicity of analyses, results from similar studies, and other relevant evidence |
| Generalisability | 21 | Discuss the generalisability (external validity) of the study results                                                                                                      |

**Other information**

|         |    |                                                                                                                                                               |
|---------|----|---------------------------------------------------------------------------------------------------------------------------------------------------------------|
| Funding | 22 | Give the source of funding and the role of the funders for the present study and, if applicable, for the original study on which the present article is based |
|---------|----|---------------------------------------------------------------------------------------------------------------------------------------------------------------|

\*Give information separately for cases and controls in case-control studies and, if applicable, for exposed and unexposed groups in cohort and cross-sectional studies.

**Note:** An Explanation and Elaboration article discusses each checklist item and gives methodological background and published examples of transparent reporting. The STROBE checklist is best used in conjunction with this article (freely available on the Web sites of PLoS Medicine at <http://www.plosmedicine.org/>, Annals of Internal Medicine at <http://www.annals.org/>, and Epidemiology at <http://www.epidem.com/>). Information on the STROBE Initiative is available at [www.strobe-statement.org](http://www.strobe-statement.org).
